1 **Endosomal GLUT3 is essential for alternative macrophage signaling, polarization, and**  
2 **function**

3 Dong-Min Yu<sup>1</sup>, Jiawei Zhao<sup>2,3</sup>, Eunice E. Lee<sup>1</sup>, Elysha K. Rose<sup>1</sup>, Ruchika Mahapatra<sup>1</sup>, Jun-Yong  
4 Choe<sup>4</sup>, E Dale Abel<sup>5</sup>, and Richard C. Wang<sup>1,6,\*</sup>

5 <sup>1</sup> Department of Dermatology, UT Southwestern Medical Center, Dallas, TX, USA

6 <sup>2</sup> Division of Hematology/Oncology, Boston Children's Hospital and Department of Pediatric  
7 Oncology, Dana-Farber Cancer Institute, Harvard Medical School, Boston, MA 02115, USA

8 <sup>3</sup> Broad Institute of MIT and Harvard, Cambridge, MA 02142, USA

9 <sup>4</sup> East Carolina Diabetes and Obesity Institute, East Carolina University, Greenville, NC 27834  
10 USA

11 <sup>5</sup> Department of Medicine, David Geffen School of Medicine, University of California, Los  
12 Angeles

13 <sup>6</sup> Harold C. Simmons Cancer Center, UT Southwestern Medical Center, Dallas, TX, USA

14 \*Correspondence: [Richard.Wang@UTSouthwestern.edu](mailto:Richard.Wang@UTSouthwestern.edu)

15 **ABSTRACT**

16 Macrophages play critical roles in both inflammation and tissue homeostasis. Classically  
17 activated (M1) macrophages promote antimicrobial and tumoricidal activity, while alternatively  
18 activated (M2) macrophages promote phagocytosis and tissue homeostasis. The facilitative  
19 GLUT1 and GLUT3 hexose transporters are expressed abundantly in different hematopoietic  
20 lineages, but their specific functions in macrophages is poorly understood. We discovered that  
21 GLUT3 expression was increased after M2-activation stimuli in macrophages. Notably, GLUT3  
22 KO BMDM (bone marrow-derived macrophages) showed marked defects in M2, but not M1,  
23 polarization. Consistent with defects in M2 polarization, GLUT3 KO macrophages showed  
24 impaired wound healing and decreased inflammation in calcipotriol-induced, atopic dermatitis-  
25 like inflammation. GLUT3 promoted IL-4/STAT6 signaling, the main signaling pathway for M2  
26 polarization, in a glucose-transport independent manner. Unlike plasma membrane-localized  
27 GLUT1, GLUT3 and components of the IL-4 signaling pathway, localized primarily to  
28 endosomes. GLUT3, but not GLUT1, interacted with Ras through its intracytoplasmic loop, and  
29 Rac1-PAK-cofilin signaling and the endocytosis of IL4R subunits were impaired in the absence  
30 of GLUT3. Thus, GLUT3 is essential for alternative macrophage polarization and function and  
31 plays an unexpected role in the regulation of endosomal signaling.

## 32 INTRODUCTION

33 Macrophages are immune cells that play critical roles in both inflammation and tissue  
34 homeostasis. While macrophages appear to exhibit dynamic and complex functional  
35 phenotypes in vivo, the dichotomous model of macrophage activation remains a critical  
36 paradigm to understand macrophage functions (Mantovani et al., 2005; Munoz-Rojas et al.,  
37 2021). Classically activated (M1) macrophages typically promote antimicrobial and tumoricidal  
38 activity, while alternatively activated (M2) macrophages promote phagocytosis and tissue  
39 homeostasis (Ley, 2017; Sica and Mantovani, 2012). M1 polarization can be induced by  
40 Interferon gamma (IFN- $\gamma$ ) and Toll-Like Receptor (TLR) agonists such as lipopolysaccharides  
41 (LPS), while M2 polarization is induced by IL-4 or IL-13 (Murray, 2017; Orecchioni et al., 2019).  
42 During the M1 polarization process, Nuclear Factor kappa-light-chain enhancer of activated B  
43 cell (NF- $\kappa$ B) and Signal Transducer and Activator of Transcription 1 (STAT1) are activated,  
44 while M2 polarization is mainly regulated by the activation of STAT6, which then result in the  
45 expression and function of M1 and M2-specific markers. For the STAT6 signaling pathway, the  
46 binding of ligands to receptors leads to the activation of Janus kinases (JAK). Activated JAK  
47 phosphorylates receptor tyrosine residues, and phospho-tyrosine sites of receptor serve as  
48 docking sites for STAT6(Hu et al., 2021).

49 Glucose transporters are responsible for the first step of glucose utilization in cells, and  
50 14 facilitative glucose transporters (GLUTs) are expressed in humans (Navale and Paranjape,  
51 2016). Among them, GLUT1 and GLUT3 were found to be expressed in human lymphocytes  
52 and macrophages (Fu et al., 2004). Both GLUT1 and GLUT3 are class I glucose transporters,  
53 and despite high similarity in amino acid sequence and structure, the two transporters show  
54 differences in their pattern of tissue expression and expression levels in different cell types  
55 (Deng et al., 2015; Deng et al., 2014). GLUT1, the most widely expressed facilitative glucose  
56 transporter, is highly expressed in erythrocytes, blood-brain barrier endothelial cells, and  
57 keratinocytes (Cura and Carruthers, 2012; Zhang et al., 2018). GLUT3 shows a more tissue-  
58 specific expression pattern than GLUT1 and is highly expressed in neurons and hematopoietic  
59 lineage cells (Fidler et al., 2017; Simpson et al., 2008). Functional studies examining the isoform  
60 specific functions of GLUTs in macrophages, and leukocytes in general, remain limited.

61 Endocytosis has traditionally been known as a mechanism to prevent excessive ligand-  
62 induced activation of downstream effectors by removing activated receptors on the cell surface  
63 (Sorkin and von Zastrow, 2009). However, endosomes can also act as a signaling platform for  
64 numerous receptor tyrosine kinases (RTKs), including epidermal growth factor receptor (EGFR),

65 by ensuring sufficient duration and intensity of signaling (Grimes et al., 1996; Vieira et al., 1996)  
66 In particular, for IL-4 receptor signaling, endosomes have been found to be essential for efficient  
67 ligand-induced receptor dimerization and signal transduction. IL-4 receptor subunits endocytosis  
68 is distinct from the endocytosis of many RTKs and transforming growth factor beta (TGF- $\beta$ ) and  
69 has been found to be Rac1-, Pak- and actin-mediated (Kurgonaite et al., 2015).

70 In this study, we evaluated the subcellular localization and function of the most highly  
71 expressed glucose transporters in macrophages, GLUT1 and GLUT3. We confirmed that  
72 GLUT1 expression was increased in M1 macrophages and discovered that GLUT3 expression  
73 was increased in M2 macrophages. Notably, GLUT3 KO BMDM (bone marrow-derived  
74 macrophages) showed a defect in M2 polarization *in vitro* and *in vivo*. IL-4-STAT6 signaling, the  
75 main signaling for M2 polarization, was impaired by GLUT3 deficiency. Unlike GLUT1, which  
76 localized to the plasma membrane, GLUT3, along with components of the IL-4 signaling  
77 pathway, localized to endosomes. Finally, we found that GLUT3 interacts with Ras and  
78 regulates the Rac1-PAK-actin pathway, which regulates IL-4 receptor endocytosis. Thus, our  
79 studies reveal that endosomal GLUT3 is essential for M2 polarization of macrophages by  
80 regulating IL-4-STAT6 signaling.

## 81 RESULTS

### 82 GLUT3 is induced by M2 stimuli and required for M2 polarization of macrophages

83 To investigate the specific functions of GLUT isoforms in macrophages, we began by  
84 determining their expression levels after polarization stimuli. Mouse bone marrow-derived  
85 macrophages (BMDMs) were treated with lipopolysaccharide (LPS) and interferon gamma (IFN-  
86 g) to induce M1 polarization, and IL-4 to induce M2 polarization, and expression of facilitative  
87 (GLUT) and sodium dependent (SGLT) glucose transporters isoforms were assessed by  
88 quantitative real-time RT-PCR (qRT-PCR). Consistent with previous studies, GLUT1 mRNA  
89 expression was elevated in M1 macrophages (Cho et al., 2022; Freerman et al., 2019).  
90 Notably, GLUT3 mRNA expression was significantly elevated in M2 macrophages (Fig. 1a).  
91 This finding was reproduced in additional macrophages cell lines, including human THP-1 cells  
92 and murine RAW 264.7 cells. GLUT1 and GLUT3 mRNA expression were similarly increased by  
93 M1 and M2 stimuli, respectively (Fig. 1b-c). Given the striking regulation of GLUT1 and GLUT3  
94 by polarization, we focused on these two transporters and their impact on macrophage  
95 polarization markers. We generated WT (*Slc2a1*<sup>flox/flox</sup>; LysM-Cre<sup>-</sup> or *Slc2a3*<sup>flox/flox</sup>; LysM-Cre<sup>-</sup>)  
96 and myeloid cell-specific GLUT1 KO (*Slc2a1*<sup>flox/flox</sup>; LysM-Cre<sup>+</sup>) and GLUT3 KO (*Slc2a3*<sup>flox/flox</sup>;  
97 LysM-Cre<sup>+</sup>) BMDMs to address these questions. Consistent with previous reports, we found that  
98 GLUT1 KO BMDMs showed defects in M1 polarization as shown by the strong reduction in  
99 common M1 markers such as *Nos2* (nitric oxide synthase 2), *Tnfa* (tumor necrosis factor a) and  
100 *Il1b* (interleukin-1 b). No significant difference in M2 markers after M2 polarization were noted  
101 between WT and GLUT1 KO BMDMs (Fig. 1d). Strikingly, GLUT3 KO BMDMs showed an  
102 increased expression of M1 markers compared to WT after M1 polarization, whereas the  
103 expression of common M2 markers *Arg1* (arginase), *Retnla* (resistin like alpha), and *Chil3l3*  
104 (chitinase-like 3) was significantly reduced after M2 polarization (Fig. 1e). We next investigated  
105 the effect of GLUT1 or GLUT3 deficiency on glucose uptake assays using 2-deoxyglucose  
106 uptake assays in macrophages. Glucose uptake was decreased in GLUT1 KO BMDMs  
107 compared to WT BMDMs by M1 stimuli, but there was no difference in glucose uptake after M2  
108 stimuli. Consistent with the increased expression of M1 polarization markers, GLUT3 KO  
109 BMDMs showed increased glucose uptake after M1 stimuli compared to WT BMDMs. However,  
110 there was no difference in 2-DG uptake from the media after M2 polarization (Fig. 1f).

### 111 GLUT3 KO macrophages rescue a mouse model of calcipotriol induced atopic dermatitis

112 Given the striking impact of GLUT3 deficiency on M2 polarization *in vitro*, we next investigated  
113 its impact on macrophage function *in vivo*. While M2 macrophages are best known for their  
114 functions in tissue homeostasis, they have also been shown to play important roles in promoting  
115 allergic (Type 2) inflammation (Kasraie and Werfel, 2013; Suzuki et al., 2017). Thus, we studied  
116 the impact of GLUT3 deficiency in a mouse model of atopic dermatitis. Dermatitis was induced  
117 in WT, GLUT1, and GLUT3 KO mice through the topical administration of calcipotriol (MC903)  
118 and the development of the inflammation was assessed (Li et al., 2006; Oetjen et al., 2017)  
119 (Fig. 2a). The back and treated ears of WT mice and GLUT1 KO mice edema, erythema, and  
120 scaling, consistent with previous reports of the model. GLUT3 KO mice showed notably less  
121 inflammation with decreased edema, erythema, and scale compared to WT and GLUT1 KO  
122 mice (Fig. 2b). Consistent with the macroscopic observations, histological analyses revealed  
123 decreased epidermal hyperplasia and hyperkeratosis in GLUT3 KO mice compared to GLUT1  
124 KO mice or WT mice (Fig. 2c-d). To extend these findings, calcipotriol-treated tissues were  
125 harvested (Day 13) and qRT-PCR was used to detect markers of macrophage polarization.  
126 F4/80, a pan-macrophage marker was consistent throughout the WT, GLUT3 and GLUT1 KO  
127 mice. In addition, there were no significant changes in M1 markers such as *Nos2* and *Tnfa*  
128 between WT, GLUT3 and GLUT1 KO mice (Fig. 2e). However, there were significant reduction  
129 in M2 marker levels in GLUT3 KO mice compared to WT and GLUT1 KO mice (Fig. 2f). In  
130 addition, we found that levels of several Th2 cytokines, including IL-4, IL-13, and IL-31, which  
131 are known to increase in response to calcipotriol treatment, (Li *et al.*, 2006; Li et al., 2005) were  
132 significantly reduced after GLUT3 KO compared to WT mice (Fig. 2g).

### 133 **Wound healing is delayed in GLUT3 KO mice**

134 M2 macrophages have also been shown to play a critical role in wound healing, particularly in  
135 the later phases of neovascularization and tissue remodeling (Rehak et al., 2022). Thus, as a  
136 second *in vivo* mouse model, we performed a splinted, excisional wound healing model. The  
137 back skin of WT, GLUT1, and GLUT3 KO mice were excised by punch biopsy, splinted, and  
138 wound healing was measured every two days (Fig. 3a). In GLUT3 KO mice, wound healing was  
139 significantly delayed compared to WT and GLUT1 KO mice (Fig. 3b-c). We also examined  
140 macrophage markers from tissue obtained from the wound edge. Consistent with the atopic  
141 dermatitis model, there was no difference in the expression of total macrophage and the M1  
142 macrophage markers, but the expression of the M2 markers was significantly reduced in GLUT3  
143 KO mice (Fig. 3d-e). Immunofluorescence (IF) of the wound tissues was used to corroborate the  
144 qRT-PCR studies. Specifically, wound tissues were co-stained with the pan-macrophage

145 marker, F4/80, and the M2 marker, Arg1 (arginase). While there was no significant difference in  
146 the degree of F4/80 staining in WT, GLUT1 KO, and GLUT3 KO mice, the expression of Arg1  
147 (arginase1) and the number of F4/80<sup>+</sup> Arg1<sup>+</sup> macrophages was significantly reduced in GLUT3  
148 KO mice (Fig. 3f-g). Finally, additional markers relevant to tissue remodeling and angiogenesis,  
149 which have previously been shown be involved in the wound healing process, were also  
150 consistently reduced in GLUT3 KO mice (Koo et al., 2019; Okonkwo et al., 2020; Zomer and  
151 Trentin, 2018) (Fig. 3h-i). Thus, using two in vivo models of M2 polarization, we conclude that  
152 myeloid cell-specific GLUT3 is required for M2 polarization and function.

### 153 **STAT6 signaling is impaired by GLUT3 deficiency**

154 To elucidate the mechanism of the relationship between GLUT3 and M2 polarization in  
155 macrophages, we investigated macrophage polarization signaling in greater detail. There was  
156 no difference in phosphorylation of STAT1 by LPS and IFN-g in GLUT1 KO BMDMs, but  
157 phosphorylation of STAT6 by IL4 was notably reduced in GLUT3 KO BMDMs (Fig. 4a-b). The  
158 effects on STAT6 signaling were confirmed in human and mouse macrophage cells lines.  
159 GLUT3 knockdown also strongly reduced the expression of phospho-STAT6 in THP-1 and  
160 RAW264.7 cells (Fig. 4c-d). We next determined whether GLUT3 also affected phosphorylation  
161 of JAK1 upstream of STAT6 in IL4 signaling. Levels of phospho-JAK1 was also decreased by  
162 GLUT3 deficiency in BMDMs (Fig. 4e). These findings reveal that GLUT3 is required for M2  
163 polarization by promoting IL4 signaling.

164 As GLUT3 knockout did not significantly affect glucose uptake in BMDM, we next  
165 investigated whether the glucose transport function of GLUT3 was required for its role in  
166 stimulating STAT6 signaling. First, after identifying missense mutations that blocked glucose  
167 transport in the GLUT1 transporter without impacting protein stability, the orthologous missense  
168 mutations were generated in GLUT3 alleles (Deng *et al.*, 2014; Raja and Kinne, 2020). After  
169 lentiviral transduction, WT and most mutant GLUT3 alleles were stably expressed and  
170 membrane localized in Rat2 fibroblasts (Supplementary Fig. 1a-b). Among these mutants, the  
171 R331W mutant showed the greatest reduction in glucose uptake compared to WT GLUT3 and  
172 was selected for downstream analyses (Supplementary Fig. 1c). Short-hairpin resistant alleles  
173 of GLUT3 (WT, R331W) were generated and stably expressed in THP-1 cells. Then, sh-GLUT3  
174 was used to knockdown endogenous GLUT3 in THP-1 cells expressing hairpin-resistant WT or  
175 R331W mutant GLUT3. As expected, sh-GLUT3 compromised STAT6 signaling in vector  
176 control cells. Notably, both WT and R331W GLUT3 rescued pSTAT6 activation after  
177 endogenous GLUT3 knockdown (Fig. 4f). The transport-independent role of GLUT3 in STAT6



178 signal activation was further confirmed through the chemical inhibition of GLUT3. THP-1 cells  
179 were treated with a specific, small molecule inhibitor of GLUT3, G3iA (Iancu et al., 2022). After  
180 inhibition of GLUT3 with G3iA, the activation of STAT6 by IL-4 was not impaired (Fig. 4g). We  
181 next determined whether treatment with G3iA might impact the expression of markers of  
182 macrophage polarization. THP-1 cells treated with were treated with M1 or M2 polarization  
183 stimuli in the presence of increasing concentrations of G3iA for 24 hrs. Inhibition of GLUT3  
184 transport did not significantly change the expression of either M2 or M1 differentiation markers  
185 (Supplementary Fig. 2a, b). We conclude that GLUT3 promotes IL-4/STAT6 signaling and M2  
186 polarization in a glucose transport-independent manner.

### 187 **GLUT3 is localized in endosomes**

188 Several previous studies have demonstrated that GLUT3 is largely intracellular rather than  
189 localized to the cell surface (Ferreira et al., 2011; McClory et al., 2014). In particular, in primary  
190 cortical neurons, GLUT3 is mostly localized in endosomes (McClory *et al.*, 2014). Given  
191 previous studies demonstrating that the IL4 receptor complex also undergoes endocytosis and  
192 that these endosomes play a role as a signaling platform (Kurgonaite *et al.*, 2015), we next  
193 investigated the cellular localization of GLUT3 in macrophages. The localization of GLUT1 and  
194 GLUT3 were assessed after fractionation of THP-1 cells. Notably, most GLUT1 was in the  
195 plasma membrane fraction, whereas GLUT3 was found predominantly in the intracellular (non-  
196 plasma membrane) fraction (Fig. 5a). IF was performed to confirm the biochemical fractionation.  
197 Indeed, GLUT1 showed a strong localization on the cell surface, whereas GLUT3 minimally  
198 stained the cell surface and instead showed a strong co-localization signal with the endosomal  
199 marker early endosomes antigen 1 (EEA1) (Fig. 5b). To determine whether GLUT3 is  
200 specifically enriched in the endosomes, we fractionated WT BMDMs and GLUT3 KO BMDMs  
201 and enriched for the plasma membrane and endosomes using fractionation kits. Consistent with  
202 the immunostaining, GLUT1 again was found mostly in the plasma membrane fraction, whereas  
203 GLUT3 was strongly enriched in the endosomal fraction (Fig. 5c). A similar distribution for  
204 GLUT3 was noted in THP-1 and Raw 264.7 cells, where GLUT3 was predominantly present in  
205 the endosomes (Fig. 5d-e). In all three cells, the endosomal localization of GLUT3 was  
206 independent of IL4. Notably, fractionation also revealed that STAT6 and phospho-STAT6 were  
207 also mostly present in the endosomal fraction. Consistent with a critical role for endosome in IL-  
208 4 signaling, activation of STAT6 by IL4 was reduced by dynasore (Fig. 5f), a small molecule  
209 inhibitor of dynamin and endocytosis.

### 210 **GLUT3 interacts with Ras and regulates IL4R endocytosis**



211 The clathrin-independent endocytosis of IL4R, common gamma chain ( $\gamma_c$ ), and other RTKs is a  
212 process that is coordinated by small GTPases, including Rac1 and Ras, and downstream by  
213 PAK1/2 and actin (Grassart et al., 2008; Sauvonnnet et al., 2005). To dissect how endosomal  
214 GLUT3 might regulate IL-4R endocytosis and possibly other endocytic signaling pathways more  
215 broadly, we assessed the relationship between GLUT3 and proteins implicated in non-clathrin  
216 mediated endocytosis and membrane dynamics. Several proteomic studies have previously  
217 demonstrated an interaction between GLUT3 and the Ras GTPases (H-Ras, N-Ras, and K-Ras)  
218 (Bigenzahn et al., 2018; Kovalski et al., 2019). We performed a co-immunoprecipitation assay  
219 between GLUT3 and Ras, and found that endogenous GLUT3 interacted with Ras in BMDMs  
220 (Fig. 6a). To confirm the specificity of the interaction, HEK293T were transfected with GLUT1 or  
221 GLUT3. Ras was detected after immunoprecipitation of GLUT3, but not GLUT1, demonstrating  
222 the specificity of the interaction between Ras and GLUT3 (Fig. 6b). GLUT1 and GLUT3 are  
223 highly homologous proteins, with most differences localizing to their intracytoplasmic loop (ICH)  
224 and carboxy terminal (Cterm) motifs (Supplementary Fig. 3). Using GLUT3 chimeric mutants  
225 that possessed the GLUT1 ICH, GLUT1 Cterm, or both, Ras co-immunoprecipitation  
226 experiments were repeated. Notably, the WT and Cterm GLUT3 alleles interacted with Ras, but  
227 not the ICH and double chimeric mutant, indicating that the GLUT3 ICH motif was necessary for  
228 the interaction between GLUT3 and Ras (Fig. 6c). Next, short-hairpin resistant WT and chimeric  
229 GLUT3 alleles were lentivirally transduced in THP-1 cells. After knockdown of endogenous  
230 GLUT3 with sh-GLUT3, pSTAT6 signaling was partially rescued by WT and Cterm GLUT3  
231 alleles, but less effectively rescued by the ICH and double chimeric GLUT3 mutants pSTAT6  
232 activation after endogenous GLUT3 knockdown (Fig. 6d).

233 One established down-stream targets of Ras is Rac1 (Scita et al., 2000), which also  
234 regulates the endocytosis of IL-4R in addition to other cytokine receptors (Doherty and  
235 McMahon, 2009; Grassart *et al.*, 2008). PAK and cofilin are then targeted by Rac1 to regulate  
236 endocytosis (Doherty and McMahon, 2009; Moller et al., 2019). Thus, we checked whether the  
237 phosphorylation status of PAK and cofilin might be affected by GLUT3 deficiency. In BMDMs  
238 and THP-1 cells, IL-4 treatment induced a notable increase in both phospho-PAK and phospho-  
239 cofilin levels. Notably, GLUT3 KO or shRNA inhibited the phosphorylation of both PAK and  
240 cofilin (Fig. 6e-f). Finally, endosomal preparations revealed that the endocytosis of IL4Ra and  
241 Common  $\gamma$  chain were also reduced by GLUT3 deficiency (Fig. 6g-h). WB and qRT-PCR  
242 analyses of IL4Ra and the  $\gamma_c$  chain confirmed that their expression was not affected by GLUT3

243 deficiency (Supplementary Fig. 4). We conclude that GLUT3 interacts with Ras and regulates  
244 IL4R endocytosis and signaling and that this requires the ICH domain of GLUT3.

## 245 DISCUSSION

246 In many cell types, both GLUT1 and GLUT3 are expressed at high levels, yet the  
247 specific functions of GLUT3 in cells like macrophages has not been clarified. For the first time,  
248 we investigated both the functions of GLUT1 and GLUT3 in myeloid cells. Using myeloid cell-  
249 specific GLUT1 and GLUT3 deletion mice, we revealed that the two proteins have strikingly  
250 distinct roles in specifying macrophage function. Our studies confirm previous overexpression  
251 and myeloid cell (LysM-Cre) GLUT1 deletion studies that have demonstrated an important role  
252 for GLUT1 in glucose uptake and M1 macrophage activation(Cho et al., 2020; Freemerman *et*  
253 *al.*, 2019). In contrast, GLUT3 KO macrophages did not show differences in glucose uptake in  
254 vitro and showed defects in M2 polarization.

255 GLUT1 and GLUT3 have previously been reported to possess distinct subcellular  
256 localizations in both polarized and non-polarized mammalian cells (Harris et al., 1992; Sakyo  
257 and Kitagawa, 2002). Previous studies have indicated that GLUT3 localizes primarily to  
258 intracellular, rather than exclusively to the plasma, membrane of neurons (McClory *et al.*, 2014).  
259 We extended these findings to macrophages with immunofluorescence and fractionation  
260 experiments. We find that GLUT1 localized largely to the plasma membrane, while GLUT3  
261 localized primarily to endosomes. The localization of GLUT3 to intracellular membranes is  
262 consistent with its function endosomal signaling and with the absence of a role in glucose  
263 uptake from the media. Notably, we observed that GLUT3-positive endosomes function as  
264 'signaling endosomes' for IL-4/STAT6 signal transduction. Activation of JAK1, which  
265 preferentially occurs at the endosome (Kurgonaite *et al.*, 2015), is inhibited by GLUT3  
266 deficiency. Activated phospho-STAT6 was enriched in the endosomes of WT BMDMs after IL-4  
267 stimulation, but this activation was notably impaired in the endosomes of GLUT3 KO BMDMs.  
268 Consistent with the finding that the inhibition of endocytosis with dynasore could inhibit IL-4-  
269 STAT6 activation in WT BMDMs, we found that GLUT3 deficiency inhibited IL-4R endocytosis.  
270 Thus, in macrophages, we identify an unexpected and essential function for GLUT3 in signal  
271 transduction; one that is transport independent.

272 Our discovery of a critical role for GLUT3 in the coordination of membrane signaling  
273 provide context for previous proteomic studies which revealed Ras isoforms (Bigenzahn *et al.*,  
274 2018; Kovalski *et al.*, 2019) and actin (Huttlin et al., 2015) as GLUT3 interacting proteins. We  
275 confirmed that GLUT3 interacted with Ras in BMDMs by co-immunoprecipitation and further that  
276 this interaction required the intracytoplasmic loop (ICL). The palmitoylation of GLUT1, but not  
277 GLUT3, near the ICL motif is necessary for the efficient localization of GLUT1 to the plasma

278 membrane (Zhang et al., 2021). Additional studies will be necessary to determine whether  
279 palmitoylation plays a role in the differential interactions between GLUT1, GLUT3, and Ras.  
280 While Ras signaling is thought to occur primarily at the plasma membrane, Ras isoforms also  
281 localize to endosomes (Chandra et al., 2011; Tian et al., 2007). Ras and Rac1 participate  
282 broadly in endocytosis and membrane remodeling, and we find that GLUT3 deficiency reduced  
283 phosphorylation of the Rac1 targets PAK and cofilin in BMDMs. IL-4R subunits are internalized  
284 by an actin-dependent endocytosis route (Kurgonaite *et al.*, 2015; Sauvonnnet *et al.*, 2005), and  
285 our observations of IL-4 activated and GLUT3-dependent changes in phospho-cofilin are  
286 consistent with a role for GLUT3 in coordinating these activities. In summary, we propose that  
287 GLUT3 is critical for the function of a signaling complex involving Ras, Rac1, Pak, and actin,  
288 which ultimately regulate IL-4 receptor mediated signal transduction. Previous studies have  
289 suggested the coordinated activation of IL-4 signaling and Rac-Cdc42-Pak activation (Wery-  
290 Zennaro et al., 2000) or between JAK1-STAT6 and Ras1-Erk signaling (So et al., 2007). Our  
291 model suggests that crosstalk between these pathways could occur through GLUT3 at the level  
292 of RTK endocytosis and activation. Additional studies that specifically address the links between  
293 IL-4 and other RTKs and the Ras-Rac1-PAK pathway are necessary to confirm and extend our  
294 findings.

295 While we specifically delineated an upstream role for GLUT3 in IL-4-STAT6 signaling in  
296 macrophages, it is likely that its role in promoting signal transduction is more broadly conserved.  
297 Many RTKs, and cytokine receptors in particular, require endocytosis to endosomes to promote  
298 signaling. However, not all cytokines require endocytosis and endosomal enrichment for signal  
299 transduction. Specifically, IFN- $\gamma$  signaling occurs efficiently at the plasma membrane (Blouin  
300 and Lamaze, 2013), perhaps explaining why M1 polarization stimuli may not be abrogated by  
301 loss of GLUT3. A more detailed catalog of the specific cytokines and signaling pathways that  
302 require GLUT3 for optimal signal transduction will require further investigation.

303 Overall, our findings suggest that GLUT3, in contrast to GLUT1, plays an unexpected  
304 role in membrane dynamics and signal transduction. Like M2 macrophages, many of the cell  
305 types in which GLUT3 is highly expressed—neurons, melanocytes, Langerhans cells, platelets,  
306 and others—share the feature of having extensive, compartmentalized endomembrane  
307 systems. We speculate that GLUT3 is particularly important for the regulation and maintenance  
308 of these complex endomembrane complexes. Our studies in BMDMs and macrophage lines  
309 reveal novel functions for GLUT3 in M2 polarization and signaling. Mouse models of wound  
310 healing and atopic dermatitis confirm the critical role of GLUT3 in signaling in vivo and

311 demonstrate the biological importance of this distinct glucose transporter isoforms. It will be  
312 interesting to determine whether GLUT3's role in STAT signaling is conserved in other cell types  
313 that express GLUT3.

## 314 **METHODS**

### 315 **Animal studies**

316 This study was performed in strict accordance with the recommendations in the Guide for the  
317 Care and Use of Laboratory Animals of the National Institutes of Health. All animal studies were  
318 conducted in accordance with institutional guidelines and was approved by the Institutional  
319 Animal Care and Use Committee (IACUC), animal protocol number 2015–101166 of the  
320 University of Texas Southwestern. All efforts were made to follow the Replacement, Refinement  
321 and Reduction guidelines.

322 Slc2a1<sup>flox/flox</sup> and Slc2a3<sup>flox/flox</sup> mice were obtained from Dr. E. Dale Abel, and LysM-Cre mice  
323 were obtained from The Jackson Laboratory. We generated myeloid cell specific GLUT1 and  
324 GLUT3 KO mice by crossing Slc2a1<sup>flox/flox</sup> mice and Slc2a3<sup>flox/flox</sup> mice with LysM-Cre mice,  
325 respectively.

326 For calcipotriol (MC903) induced atopic dermatitis model, 1.125 nmol calcipotriol in ethanol was  
327 applied to the right ear and the shaved back of mice for 13 days. Wound healing assays were  
328 completed as previously described (Zhang *et al.*, 2018). Briefly, an excisional wound was  
329 generated on the shaved back skin of mice with a 3mm punch biopsy. Wounds were splinted  
330 with a silicone ring and wound healing was measured every two days.

### 331 **Preparation of mouse bone-marrow derived macrophages (BMDMs)**

332 Bone marrow was harvested from age-matched male WT (Slc2a1<sup>flox/flox</sup>; LysM-Cre<sup>-</sup> or  
333 Slc2a3<sup>flox/flox</sup>; LysM-Cre<sup>-</sup>) and myeloid cell-specific GLUT1 KO (Slc2a1<sup>flox/flox</sup>; LysM-Cre<sup>+</sup>) and  
334 GLUT3 KO (Slc2a3<sup>flox/flox</sup>; LysM-Cre<sup>+</sup>) as previously described with minor modifications  
335 (Weischenfeldt and Porse, 2008). BMDMs were generated by culturing marrow cells in poly-L-  
336 lysine coated culture plate for 7 days with 50 ng/ml M-CSF in RPMI 1640 (Sigma-Aldrich,  
337 R8758) supplemented with 20% FBS, 1X Glutamax (Fisher Scientific, 35050061) and 1X  
338 Antibiotic-Antimycotic solution (Thermo Scientific, 15240062). BMDMs were activated using 100  
339 ng/ml LPS and 50 ng/ml IFN-g (for M1) or 10 ng/ml IL-4 (for M2) for 24 h.

### 340 **Cell lines and Cell culture**

341 The human macrophage THP-1 cells (ATCC) were culture in RPMI 1640 supplemented with  
342 10% FBS and 1X Antibiotic-Antimycotic solution. THP-1 monocytes are differentiated into  
343 macrophages by 36 h incubation with 20 nM phorbol 12-myristate 13-acetate (PMA, Sigma,  
344 P8139). The murine macrophage Raw 274.7 cells (ATCC) were cultured in DMEM (Sigma-  
345 Aldrich, D5796) supplemented with 10% FBS and 1X Antibiotic-Antimycotic solution. All cells  
346 were grown at 37°C with 5% CO<sub>2</sub>.

### 347 **[<sup>3</sup>H]2-deoxyglucose uptake assay**

348 2-DG uptake were measured as previously described (Lee et al., 2015). Briefly, BMDMs from  
349 WT, GLUT1 KO and GLUT3 KO mice were seeded in triplicate into 12-well plates overnight.  
350 The cells were washed twice with PBS, incubated in basic serum-free DMEM medium for 2 h  
351 per well. Uptake was initiated by addition of 1  $\mu$ Ci [3H]2-DG (25-30 Ci/mmol, PerkinElmer,  
352 NET549) and 0.1 mM unlabeled 2-DG (Sigma, D8375) to each well for 10 mins. Transport  
353 activity was terminated by rapid removal of the uptake medium and subsequent washing three  
354 times with cold PBS with 25 mM glucose (Sigma, G7528). Cells were lysed with 0.5 ml of 0.5 M  
355 NaOH (Fisher Scientific, SS255-1) and neutralized with 0.5 ml or 0.5 M HCl (Sigma, 320331),  
356 which was added and mixed well. 250  $\mu$ l of the lysate was transferred to a scintillation vial  
357 containing scintillation solution, and the sample was analyzed by liquid scintillation counting.  
358 Protein concentrations were determined through BCA assays (Thermo Scientific, 23227).

### 359 **GLUT3 short hairpins, GLUT3 expression alleles, and lentiviral transductions**

360 GLUT3 short hairpin RNA (shRNA) sequences were designed for pLKO.1 using the TRC  
361 shRNA Design Process (<https://portals.broadinstitute.org/gpp/public/resources/rules>). Forward  
362 and reverse oligos were annealed in NEB buffer 2, boiled at 95 for 10 min and slowly cool to  
363 room temperature, then ligated into pLKO.1 vector (Addgene #10878) using AgeI/EcoRI. The  
364 constructs were confirmed by Sanger Sequencing. An amino-terminal 3xFlag epitope tagged  
365 human GLUT3 was generated by PCR (Addgene #72877) (Supplementary Table 1). Missense  
366 mutant (N32S, G312S, N315T, R331W) and sh-GLUT3 resistant GLUT3 alleles (sh1sh3 resist)  
367 were designed and synthesized as DNA fragments by Integrated DNA Technology (IDT)  
368 (Supplementary Table 1). After PCR amplification, GLUT3 missense mutants, the GLUT3  
369 sh1sh3 resistant mutant, and double mutants were cloned by restriction digestion. Short hairpin  
370 resistant chimeric mutants of Flag-tagged GLUT3 alleles were generated using NEBuilder HiFi  
371 DNA Assembly Cloning Kit (New England Biolabs, E5520) according to the manufacturer's  
372 protocol. Vector (WT GLUT3) and inserts (GLUT3 ICH, GLUT3 Cterm) were amplified by PCR  
373 using indicated the primer sets (Supplementary Table 1). PCR fragments were assembled after  
374 incubation at 50 °C for 30 min with the NEBuilder® HiFi DNA Assembly Master Mix in the kit. All  
375 constructs were confirmed by Sanger sequencing.

376 For generating lentiviruses, LentiX-293T cells (Clontech, 632180) were seeded at ~60%  
377 confluence in antibiotics free media 12–16 h before transfection. 4.5 $\mu$ g of shRNA or expression  
378 plasmid, 2.5 $\mu$ g of pMD2.G (Addgene #12259) and 4.5 $\mu$ g of psPAX2 (Addgene #12260) were  
379 co-transfected into LentiX-293T cells using Lipofectamine 3000 (Thermo Scientific, L3000015)  
380 according to the manufacturer's protocol. Viruses were collected after 48 and 72 h transfection.  
381 For lentiviral transduction, THP-1 cells were seeded into 6-well plate at 70% confluence. Viral



382 supernatant was then added to the cell with the polybrene at a concentration of 8  $\mu\text{g}/\text{mL}$ . Cells  
383 were selected with puromycin antibiotic at a concentration of 2  $\mu\text{g}/\text{mL}$  and hygromycin at a  
384 concentration of 100 $\mu\text{g}/\text{mL}$ . For double transductions (GLUT3 allele + sh-GLUT3), unmodified  
385 THP-1 cells were serially transduced first with the GLUT3 expression plasmid by puromycin  
386 selection followed by the sh-GLUT3 allele by hygromycin selection.

### 387 **siRNA interference**

388 siRNA targeting mouse Slc2a3 was synthesized from Sigma-Aldrich. Cells were transfected with  
389 100 nM siRNA using Lipofectamine RNAiMAX reagent (Thermo Fisher Scientific, 13778150)  
390 according to the manufacturer's protocol.

### 391 **RNA extraction and qRT-PCR**

392 RNA was extracted from cells or tissue using a RNeasy Mini Kit (Qiagen, 74106) and reverse  
393 transcribed to cDNAs using Iscript cDNA Synthesis Kit (Bio-Rad, 1708891) according to the  
394 manufacturer's protocol. qRT-PCR analyses were performed using the cDNAs from the reverse  
395 transcription reactions, gene-specific primers and PowerUp SYBR Green (Applied Biosystems,  
396 A25779). All primers for qRT-PCR are listed in Table S1 and S2.

### 397 **Isolation of plasma membrane and endosome**

398 Cells were fractionated into plasma membrane and endosome using fractionation kits (Invent  
399 Biotechnologies, SM-005 and ED-028) according to the manufacturer's protocol. Briefly, cells  
400 were lysed with the supplied buffer and intact nuclei and un-ruptured cells were removed by the  
401 filter cartridge and brief centrifugation. The supernatant was incubated with the supplied  
402 precipitation buffer to isolate and enrich the plasma membrane or endosome.

### 403 **Immunoblotting and immunoprecipitation**

404 For STAT6 signaling experiments, cells were stimulated with 20ng/ml IL-4 for 30min. 200 $\mu\text{M}$  of  
405 dynasore (Sigma, D7693) was pretreated for 30 minutes before IL-4 treatment. G3iA was  
406 obtained from Dr. Jun-yong Choe and cells pretreated for 10 minutes before IL-4 treatment.  
407 After stimulation, cells were lysed with Cell Lysis Buffer (Cell Signaling Technology, 9803) and  
408 whole-cell lysates (WCL) were subjected to Laemmli Sample Buffer (Bio-Rad, 1610747) and  
409 sodium dodecyl sulfate-polyacrylamide gel electrophoresis (SDS-PAGE). The separated  
410 proteins were transferred to a nitrocellulose membrane and incubated with GLUT3 (Abcam,  
411 ab191071 or ab15311), GLUT1 (Millipore Sigma, 07-1401), phospho-STAT1 (Y701) (Cell  
412 Signaling Technology, 7649), STAT1 (Cell Signaling Technology, 14994), phospho-STAT6  
413 (Y641) (Cell Signaling Technology, 9361), STAT6 (Cell Signaling Technology, 5397), phospho-  
414 JAK1(Y1034/1035) (Cell Signaling Technology, 3331), JAK1 (Cell Signaling Technology, 3332),  
415 Na<sup>+</sup>/K<sup>+</sup>-ATPase (Cell Signaling Technology, 3010), EEA1 (Cell Signaling Technology, 48453),

416 phospho-PAK (PAK1(T423)/PAK2(T402) (Cell Signaling Technology, 2601), PAK1 (Cell  
417 Signaling Technology, 2602), and Ras (Cell Signaling Technology, 8955, D2C1), and Hsp90  
418 (Cell Signaling Technology, 4877) primary antibodies. After incubating with horseradish  
419 peroxidase (HRP)-conjugated secondary antibodies, antigens were visualized using a Western  
420 Lightning Plus-ECL (Perkin Elmer, 50-904-9323).

421 For immunoprecipitation, cells were lysed in buffer containing 20 mM Tris-HCl (pH 7.4), 137  
422 mM NaCl, 1 mM MgCl<sub>2</sub>, 1 mM CaCl<sub>2</sub>. WCL were incubated with GLUT3 antibody overnight and  
423 then with Protein A/G PLUS-Agarose bead slurry (Santa Cruz Biotechnology, sc-2003) for 3h.  
424 Immunoprecipitates were analyzed by immunoblotting.

#### 425 **Immunofluorescence staining**

426 For immunofluorescence staining of cells, cells were fixed with 4% paraformaldehyde in PBS for  
427 10 min, permeabilized with 0.1% Triton X-100 for 10 min and blocked with blocking solution (3%  
428 BSA in PBS) for 1 h. Cells were then incubated with GLUT1 (Millipore Sigma, 07-1401), GLUT3  
429 (Santacruz Biotechnology, sc-30107) and EEA1 (Cell Signaling Technology, 48453) primary  
430 antibodies in blocking buffer overnight at 4°C, followed by 1 h of incubation with fluorescent dye-  
431 labeled secondary antibodies (Thermo Scientific, A11005 or A11008 ). After mounting with  
432 CytoSeal 60 (Thermo Scientific, 23244257), confocal images were captured on an LSM 780  
433 confocal microscope (Zeiss).

434 For immunofluorescence staining of tissues, tissues were fixed in 4% paraformaldehyde and  
435 embedded in paraffin. Sections (5 µm) were deparaffinized, heat retrieved at 95 °C for 30min  
436 with citrate buffer (Thermo Scientific, AP-9003-125), permeabilized with 0.1% Triton X-100 for  
437 10 min and blocked with 5% goat-serum and 0.2% BSA in PBS. Tissues were then incubated  
438 with Arg1 (Cell Signaling Technology, 93668) and F4/80 (Thermo Scientific, MA1-91124)  
439 primary antibodies overnight at 4°C, followed by 1 h of incubation with fluorescent dye-labeled  
440 secondary antibodies (Thermo Scientific, A11005 or A11007). After mounting with ProLong  
441 Gold antifade reagent with DAPI (Thermo Scientific, P36935), confocal images were captured  
442 on an LSM 780 confocal microscope (Zeiss).

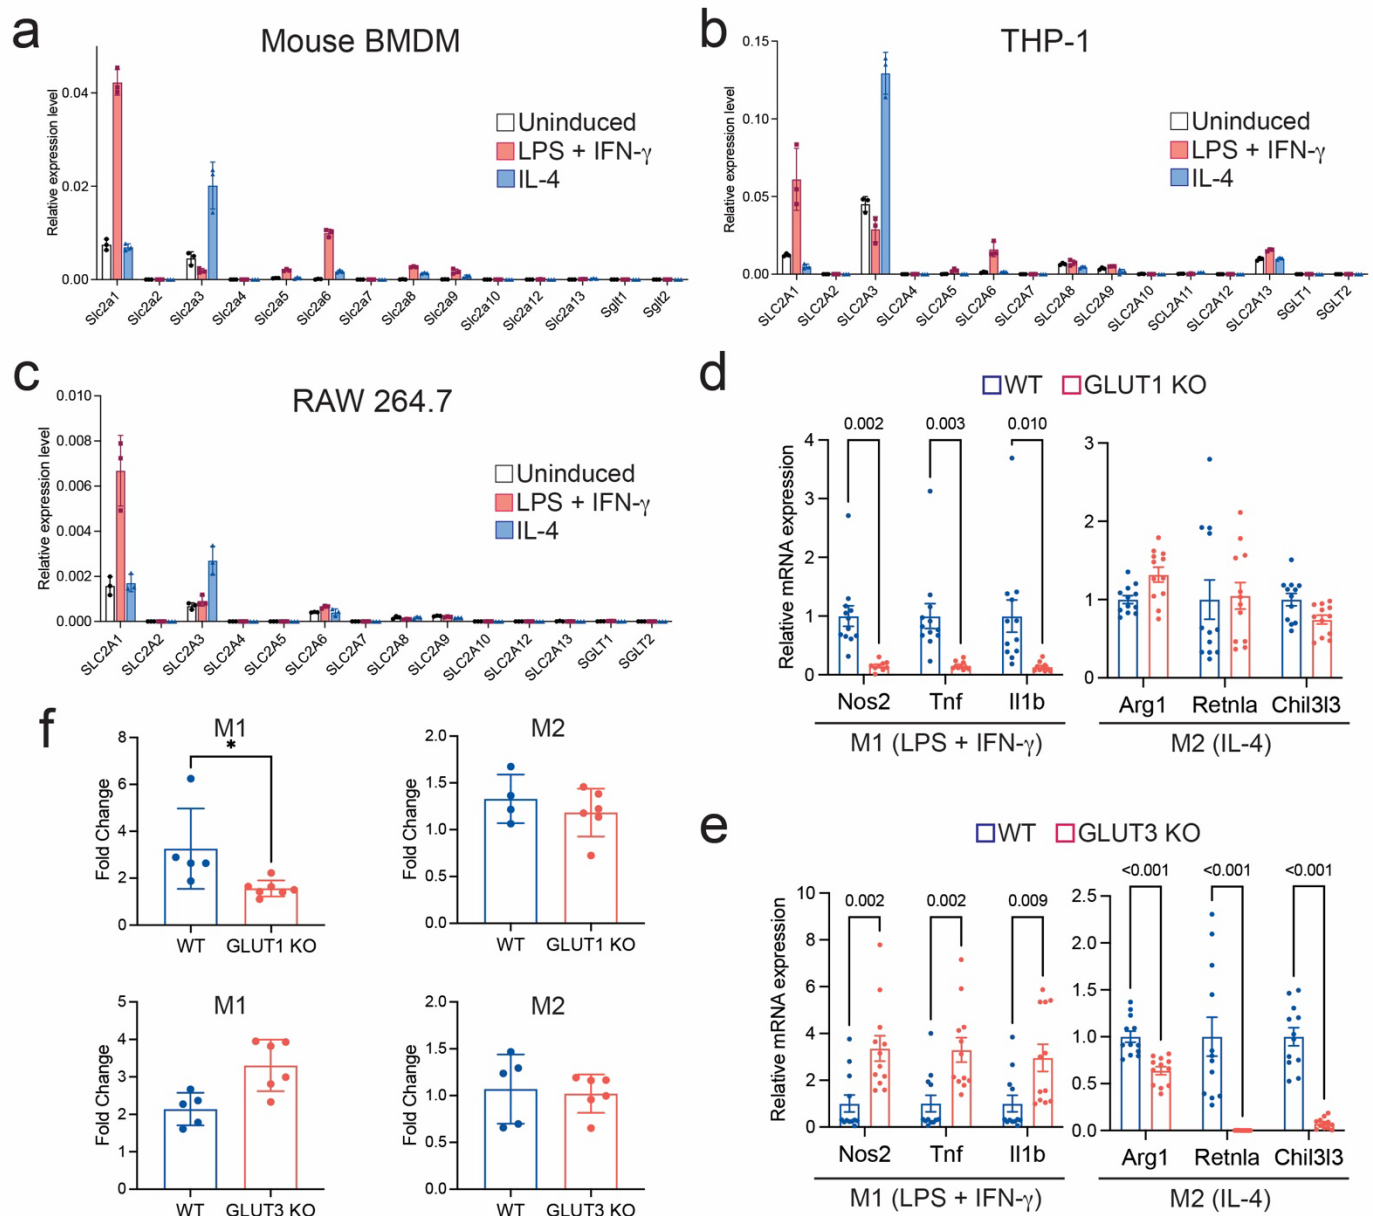

443

444 **Figure 1. Expression of GLUT3 is increased by M2 stimulus, and GLUT3 deficiency impairs M2**  
 445 **polarization of macrophages. (a-c)** mRNA expression levels of GLUT and SGLT transporter isoforms  
 446 in BMDMs (a), THP-1 cells (b), and Raw 264.7 cells (c) in unstimulated macrophages (white) and after  
 447 treatment with classic M1 (red) or alternative M2 (blue) polarization stimuli for 24 hours. Expression  
 448 normalized to  $\beta$ -actin (ACTB) expression **(d)** mRNA expression levels of M1 (Nos2, Tnfa and Il1b) and  
 449 M2 (Arg1, Retnla and Chil3l3) markers in WT (n=12) and GLUT1 KO (n=12) BMDMs after the indicated  
 450 polarization stimuli. **(e)** mRNA expression levels of M1 and M2 markers in WT (n=12) and GLUT3 KO  
 451 (n=12) BMDMs after the indicated polarization stimuli. **(f)** 2-Deoxy-D-glucose uptake in WT, GLUT1 KO,  
 452 and GLUT3 KO BMDMs after the indicated polarization stimuli. Data shown as mean  $\pm$  SEM. P values  
 453 were calculated by two-tailed t-test. \*P < 0.05, \*\*P < 0.01, \*\*\*P < 0.001.  
 454

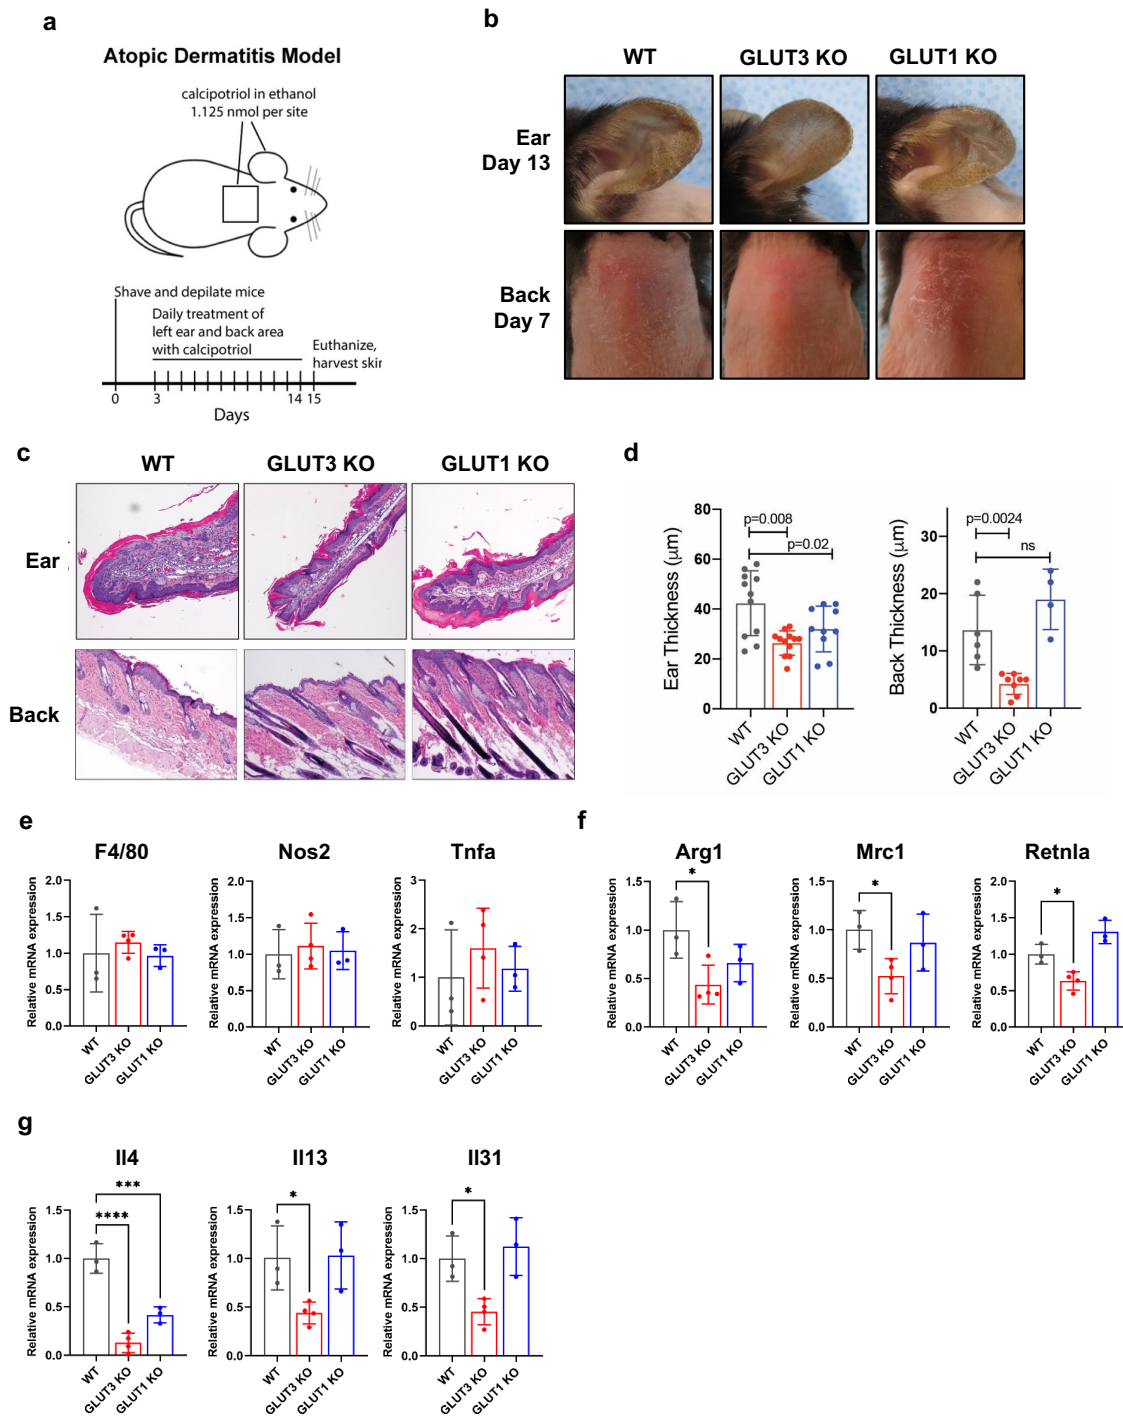

455

456 **Figure 2. GLUT3 KO macrophages rescue a mouse model of calcipotriol induced atopic**  
 457 **dermatitis like rash. (a)** Scheme for calcipotriol (MC903) induced dermatitis. Calcipotriol (1.125 nmol) in  
 458 ethanol was applied to the left ear and shaved back of the indicated mice for 13 days. **(b)** Representative  
 459 photos after calcipotriol administration in WT, GLUT3 KO and GLUT1 KO mice at day 8. **(c)** Hematoxylin  
 460 and eosin stained sections of mouse skin treated with calcipotriol analyzed at day 13 in WT, GLUT3 KO,  
 461 and GLUT1 KO mice. **(d)** Thickness of calcipotriol-treated ear and back in WT (n=11 for ear and n=6 for  
 462 back), GLUT3 KO (n=12 for ear and n=8 for back), and GLUT1 KO (n=10 for ear and n=4 for back) mice.  
 463 **(e-g)** mRNA expression levels in calcipotriol-treated ear in WT (n=3), GLUT3 KO (n=4), and GLUT1 KO  
 464 (n=3) mice. Pan-macrophage marker (F4/80), M1 markers (Nos2 and Tnfa) (e), M2 markers (Arg1, Mrc1  
 465 and Retnla) (f), and Th2 cytokines (IL-4, IL-13, and IL-31) (g) were observed. Data shown as mean  $\pm$   
 466 SEM. P values were calculated by two-tailed t-test. \*P < 0.05, \*\*P < 0.01, \*\*\*P < 0.001.



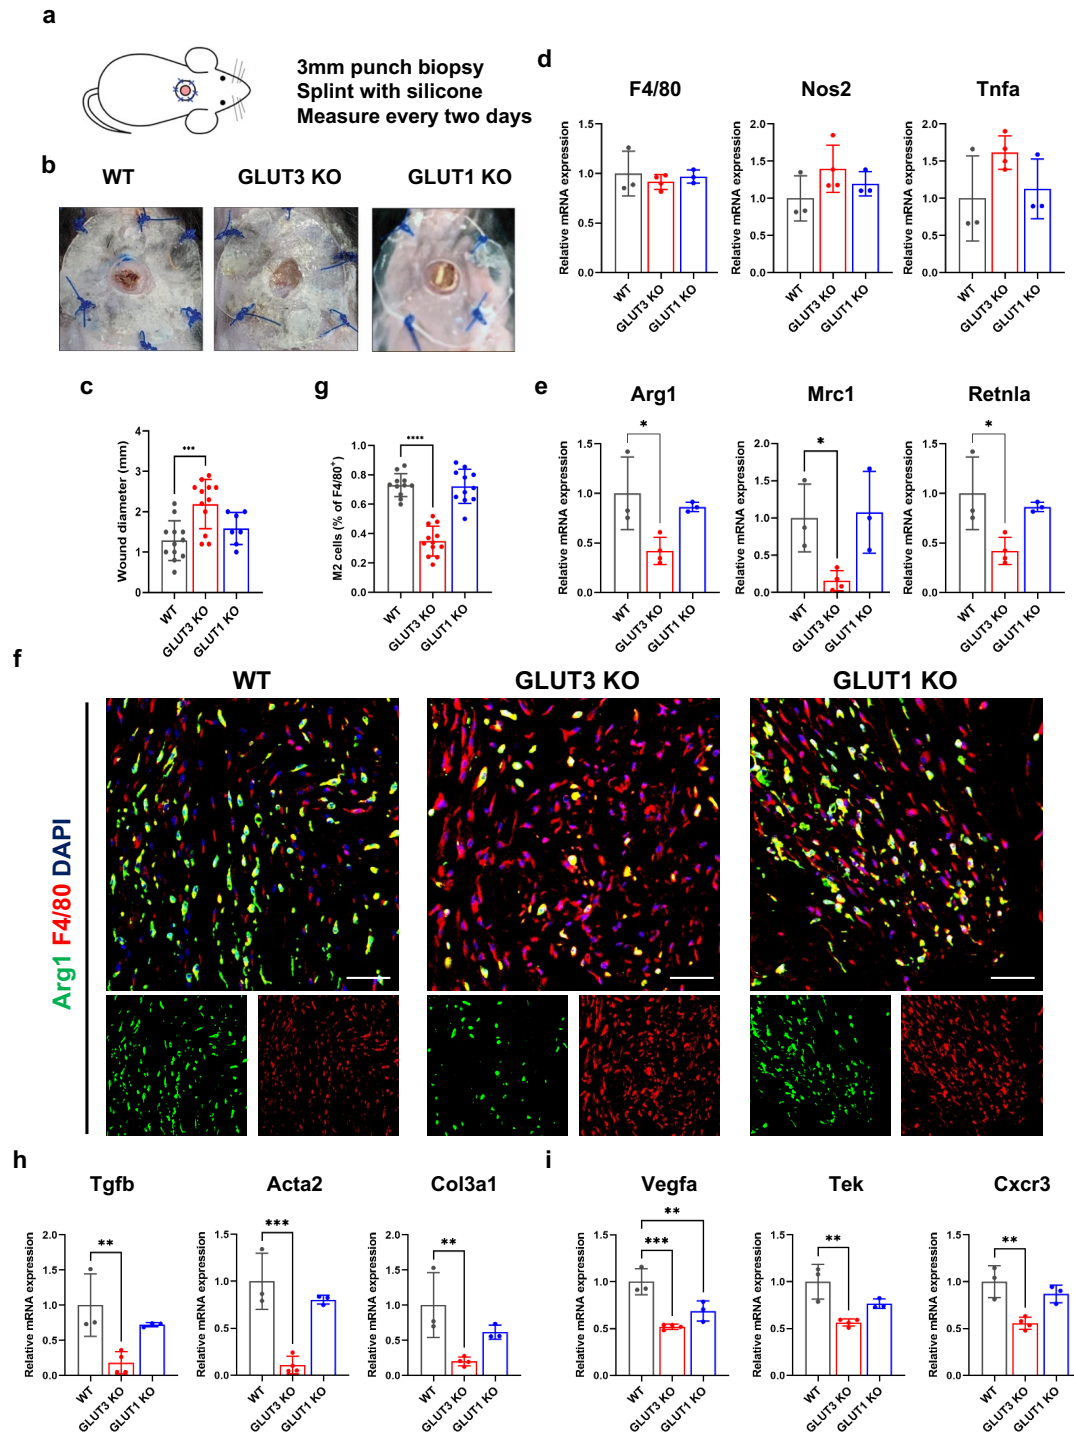

467

468 **Figure 3. Delayed wound healing in GLUT3 KO mice.** (a) Scheme for splinted wound healing model.  
 469 Wounds on the shaved back of WT, GLUT1, and GLUT3 KO mice were generated by 3.0 mm punch  
 470 biopsy, splinted, and wound healing was measured every two days. (b) Representative photos of wound  
 471 site in WT, GLUT3 KO and GLUT1 KO mice at 6 days after injury. (c) Measurements of wound diameter  
 472 on day 6 in WT (n=12), GLUT3 KO (n=12) and GLUT1 KO (n=7) mice. (d-e) mRNA expression levels of  
 473 F4/80, Nos2 and Tnfa in WT (n=3), GLUT3 KO (n=3) and GLUT1 KO (n=3) mice. (f) Representative  
 474 immunofluorescence stains of Arg1 (green), F4/80 (red) and DAPI (blue) in the wound site at 6 days after  
 475 injury. Scale bar = 50  $\mu$ m. (g) Statistical analysis of M2 macrophages at wound sites. The number of  
 476 F4/80<sup>+</sup>Arg1<sup>+</sup> cells was normalized to the number of F4/80<sup>+</sup> cells. (h-i) mRNA expression levels of tissue-  
 477 remodeling related markers (Tgfb, Acta2 and Col3a1) (h) and angiogenesis markers (Vegfa, Tek and  
 478 Cxcr3) (i). Data shown as mean  $\pm$  SEM. P values were calculated by two-tailed t-test. \*P < 0.05, \*\*P <  
 479 0.01, \*\*\*P < 0.001.

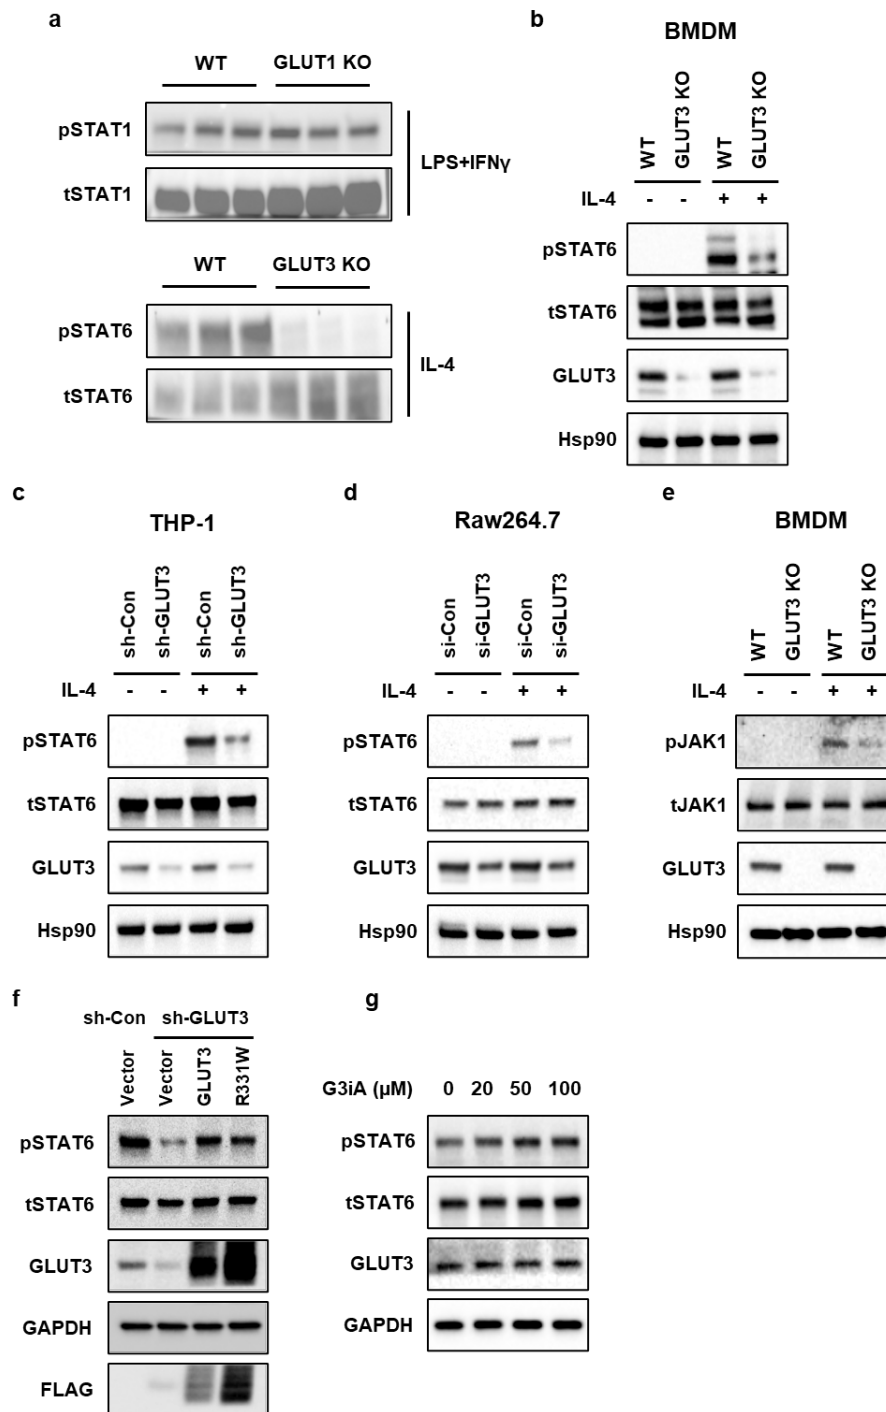

480

481 **Figure 4. STAT6 signaling is impaired by GLUT3 deficiency.** (a) Western blot analysis of the  
 482 expression of phospho-STAT1 (Y701) and total STAT1 in WT and GLUT1 KO BMDMs after LPS and  
 483 IFN $\gamma$  stimulation (upper panel). The expression of phospho-STAT6 (Y641) and total STAT6 in WT and  
 484 GLUT3 KO BMDMs after IL-4 stimulation (lower panel). (b) Representative Western blot showing IL-4–  
 485 mediated protein expression of pSTAT6 and STAT6 in WT and GLUT3 KO BMDMs. (c-d) Western blot  
 486 analysis of the expression of pSTAT6 and STAT6 after knockdown of endogenous GLUT3 in THP-1 cells  
 487 and RAW 264.7 cells using sh-RNA and si-RNA, respectively. (e) The expression of phospho-JAK1  
 488 (Y1034/1035) and total JAK1 was analyzed in WT and GLUT3 KO BMDMs after IL-4 stimulation. (f)  
 489 Expression of pSTAT6 and STAT6 after overexpression of wild type GLUT3 or GLUT3 R331W mutant  
 490 and knockdown of endogenous GLUT3 in THP-1 cells. (g) The expression of pSTAT6 and total STAT6  
 491 was analyzed in THP-1 cells after treatment with each concentration of G3iA and IL-4.

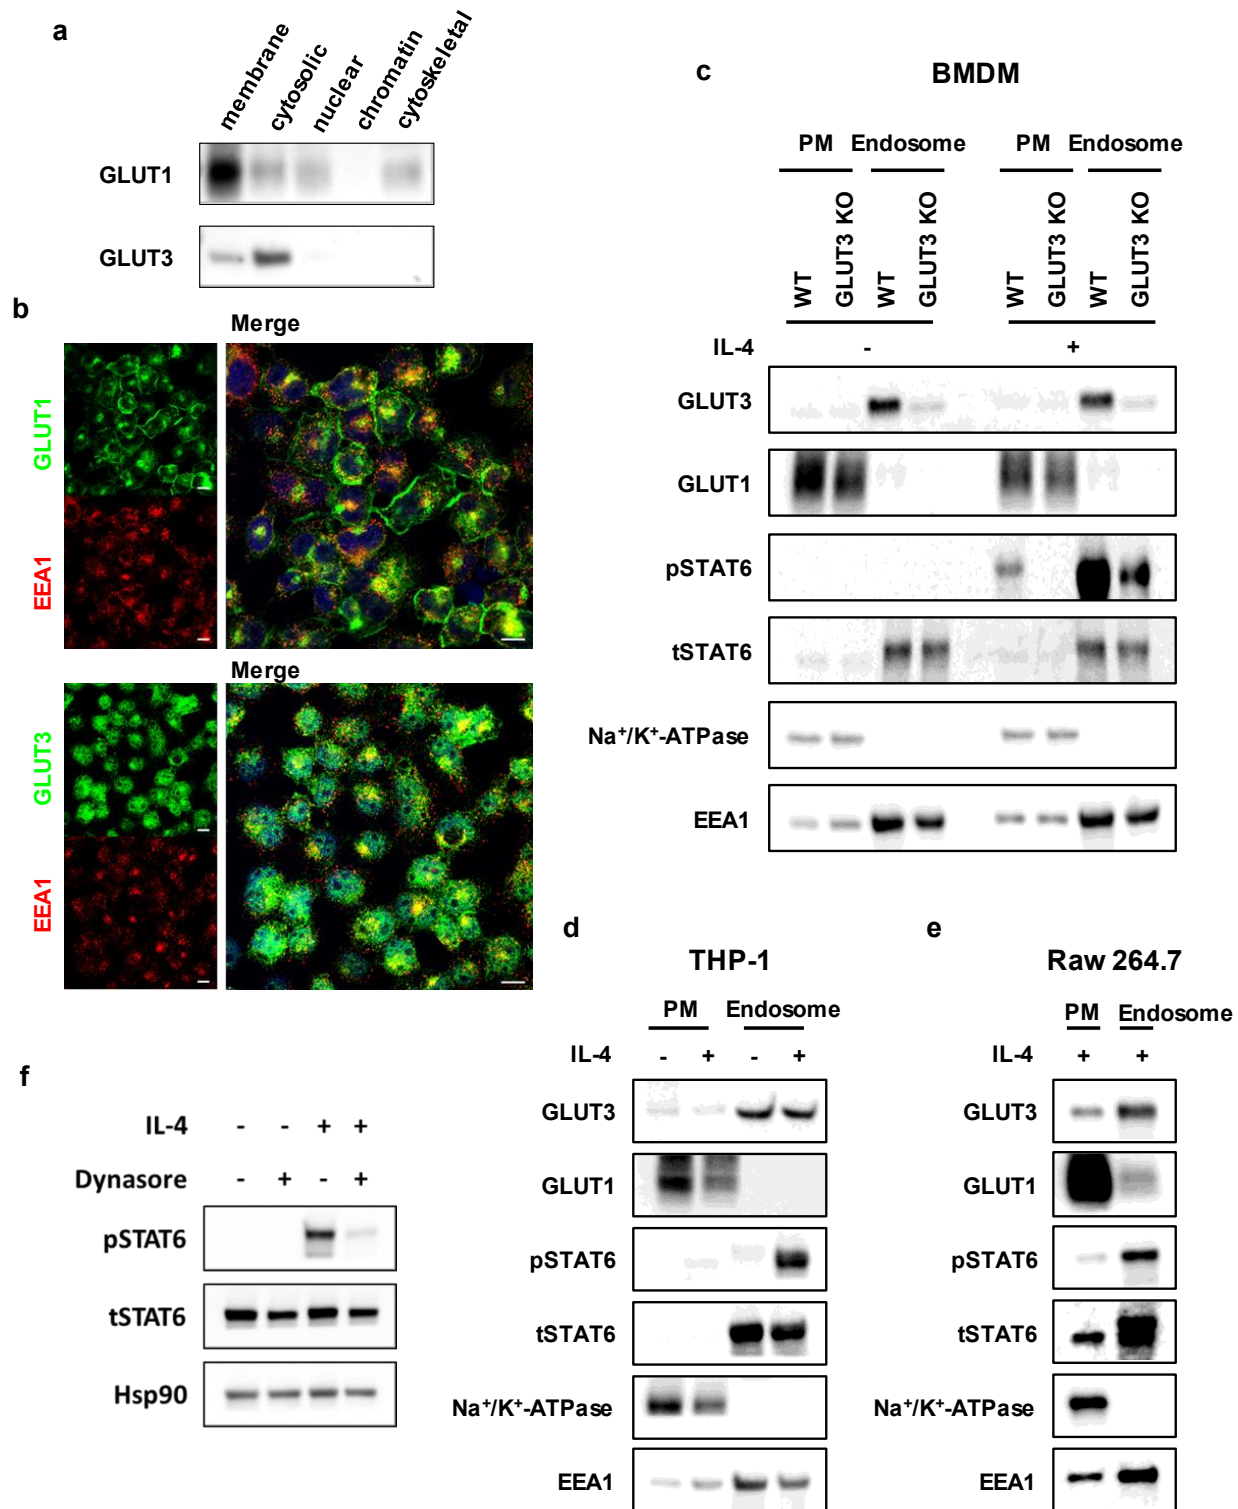

492

493 **Figure 5. GLUT3 is localized in endosomes.** (a) Western blot of GLUT1 and GLUT3 in membrane,  
 494 cytosol, nuclear, chromatin, and cytoskeletal fraction from THP-1 cells. (b) Representative  
 495 immunofluorescence stains of GLUT1 (upper panel, green), GLUT3 (lower panel, green), EEA1 (red),  
 496 and DAPI (blue) in THP-1 cells. Scale bar = 10 μm. (c-e) Western blot analysis of the expression of  
 497 GLUT3, GLUT1, pSTAT6 and STAT6 in the isolated plasma membrane (PM) and endosome fraction  
 498 from WT and GLUT3 KO BMDMs (c), THP-1 cells (d) and RAW 264.7 cells (e). Na<sup>+</sup>/K<sup>+</sup>-ATPase and  
 499 EEA1 were used as fractionation controls for the plasma membrane and endosome, respectively. (f)  
 500 Western blot analysis of the expression of pSTAT6 and STAT6 in THP-1 cells in the presence or  
 501 absence of IL-4 and dynasore.



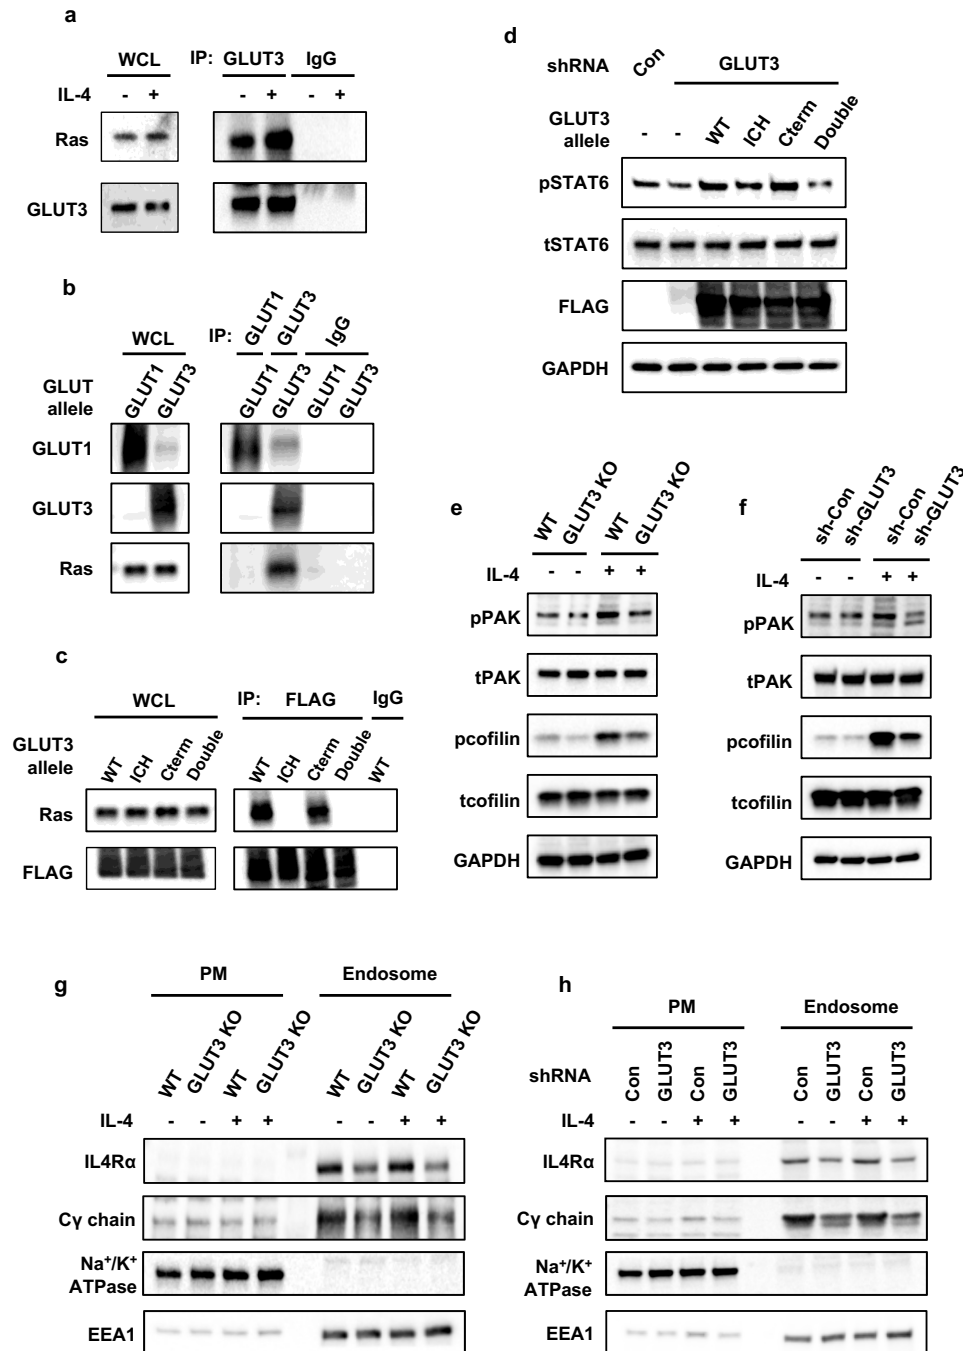

502 **Figure 6. GLUT3 interacts with Ras and regulates endocytosis of the IL4R subunits.** (a) Interaction  
503 between GLUT3 and Ras in WT BMDMs. GLUT3 was immunoprecipitated from the cell lysates and Ras  
504 (D2C1 Rabbit mAb recognizing N-Ras and K-Ras) was detected by Western blot. (b) HEK293T cells  
505 were transfected with the indicated GLUT allele, and GLUT1 (Fisher Scientific, MA1-37783) or GLUT3  
506 (Abcam, ab15311) were immunoprecipitated. Ras was detected by Western blot. Normal mouse IgG for  
507 GLUT1 and a normal rabbit IgG for GLUT3 were used as IP controls. (c) HEK293T cells were  
508 transfected with the indicated GLUT3 allele (see Figure S3) and GLUT3 alleles were Flag  
509 immunoprecipitated; Ras was detected by Western blot. IgG indicates a normal mouse IgG as IP control.  
510 (d) Expression of pSTAT6 and STAT6 after expression of indicated GLUT3 allele and knockdown of  
511 endogenous GLUT3 in THP-1 cells. (e, f) Protein expression of phospho-PAK, total PAK, phospho-cofilin  
512 (S3) and total cofilin in the presence or absence of IL-4 in WT, GLUT3 KO BMDMs (e) and THP-1 cells  
513 transfected with sh-control or sh-GLUT3 plasmid (f). (g, h) Western blot analysis of the expression of  
514 IL4Rα and Cy chain in the isolated plasma membrane (PM) and endosomal fraction from WT, GLUT3  
515 KO BMDMs (g) and THP-1 cells lentivirally transduced with sh-Con or sh-GLUT3 plasmid (h). Na<sup>+</sup>/K<sup>+</sup>-  
516 ATPase and EEA1 were used as fractionation controls.

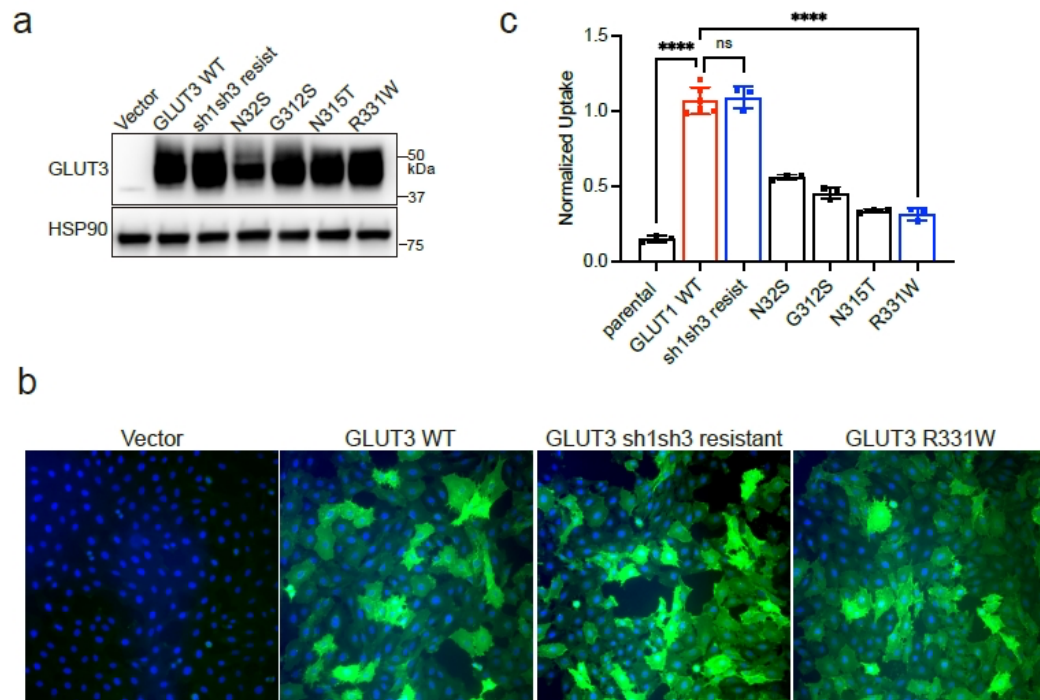

517

518 **Supplementary Figure 1. Expression and glucose uptake of WT GLUT3 and GLUT3 mutants in**  
519 **Rat2 fibroblasts. (a)** Western blot analysis of GLUT3 mutant alleles in Rat2 fibroblasts after lentiviral  
520 transduction of the indicated plasmid. HSP90, loading control. **(b)** Representative immunofluorescence  
521 stains of Flag-GLUT3 (green) and DAPI (blue) in vector, GLUT3 WT, GLUT3 sh1sh3 resistant, and  
522 GLUT3 R331W expressing Rat2 fibroblasts. **(c)** 2-Deoxy-D-glucose uptake in Rat2 fibroblasts expressing  
523 each plasmid. Data shown as mean  $\pm$  SEM. P values were calculated by one-way ANOVA with Dunnett  
524 tests. \*\*\*\*P < 0.0001.

525

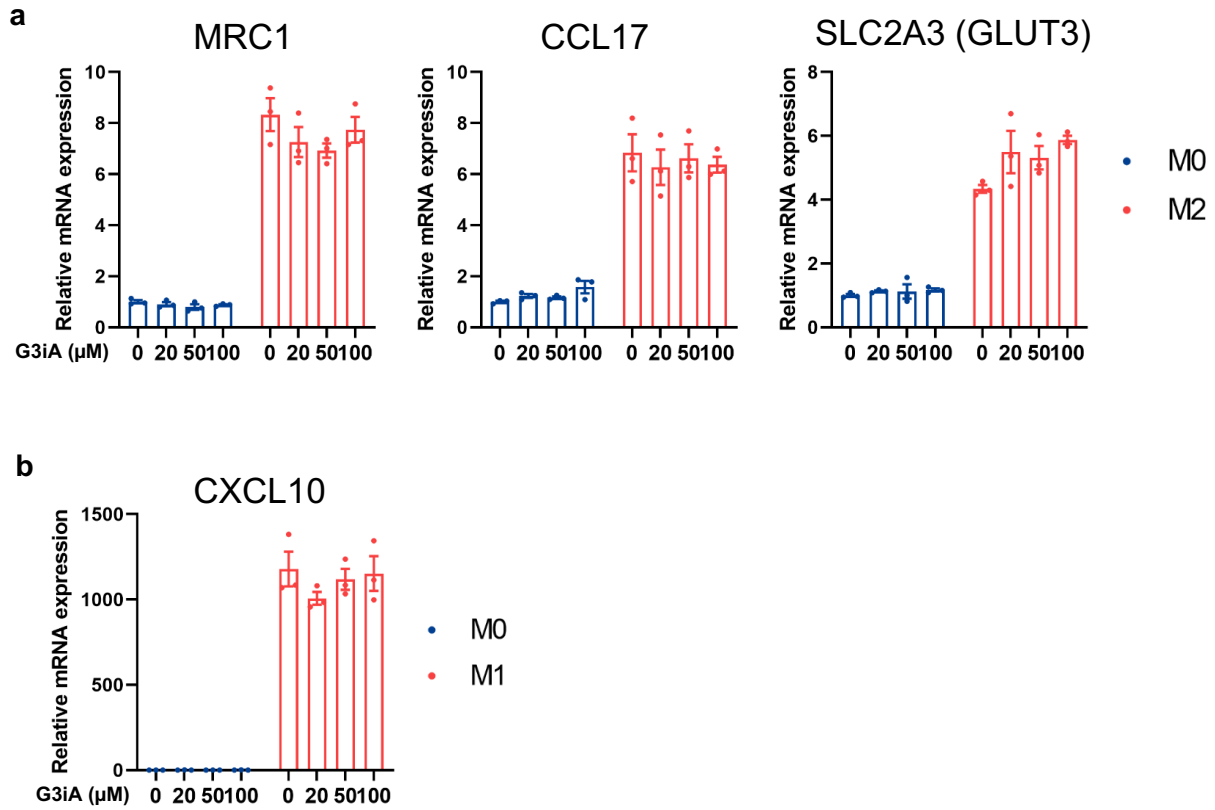

526

527 **Supplementary Figure 2. Expression of macrophage polarization markers in THP-1 cells after**  
528 **treatment with chemical inhibitor of GLUT3. (a)** THP-1 cells were induced with IL-4 and the indicated  
529 concentration of G3iA for 24 hours. Then mRNA expression of the indicated M2 polarization marker was  
530 assessed. **(b)** THP-1 cells were induced with LPS + IFN- $\gamma$  and the indicated concentration of G3iA for 24  
531 hours. Then mRNA expression of CXCL10 (M1 polarization marker) was assessed.

532

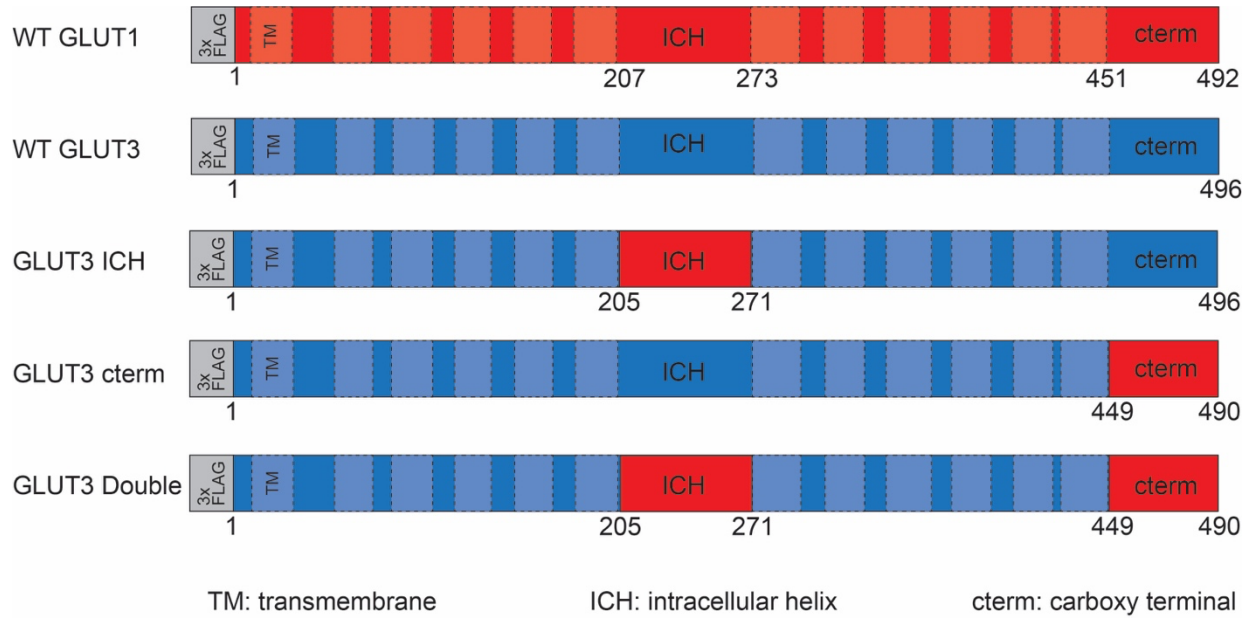

533

534 **Supplementary Figure 3. Schematic of chimeric GLUT1/GLUT3 mutants used in Ras co-**  
535 **immunoprecipitation experiments.** Alleles were amino-terminally tagged with a 3xFlag epitope tag.  
536 Dashed boxes indicated predicted transmembrane (TM) domains.

537

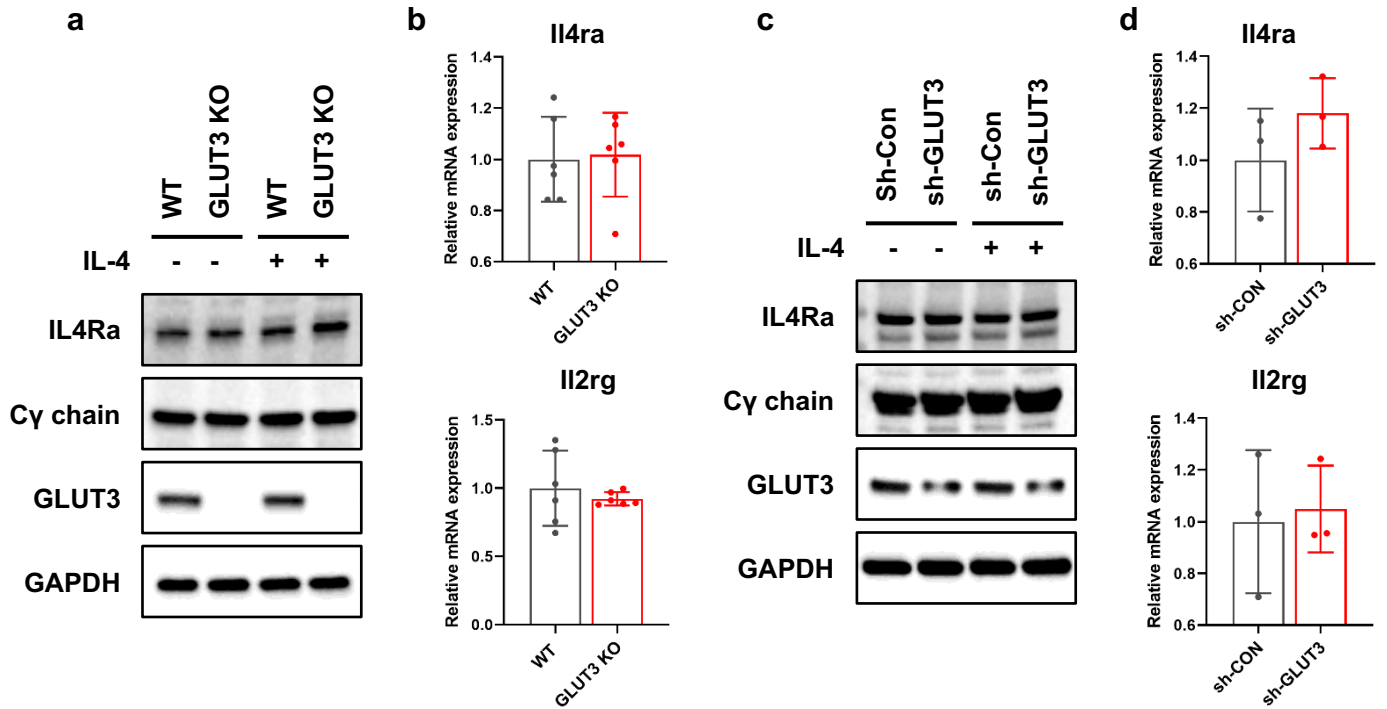

538

539 **Supplementary Figure 4. Expression of membrane receptors in GLUT3 KO BMDM and THP-1 cells**  
540 **after GLUT3 shRNA. (a)** Western blot for IL4R $\alpha$  and Cy chain in WT and GLUT3 KO BMDMs. GAPDH,  
541 loading control. **(b)** mRNA levels of IL4R $\alpha$  and Cy chain transcripts in WT and GLUT3 KO BMDMs. **(c)**  
542 Western blot for IL4R $\alpha$  and Cy chain in WT and GLUT3 KO IL4R $\alpha$  and Cy chain in THP-1 cells  
543 transduced with sh-Con or sh-GLUT3 plasmid. GAPDH, loading control. **(d)** mRNA levels of IL4R $\alpha$  and  
544 Cy chain transcripts in THP-1 cells transduced with sh-Con or sh-GLUT3 plasmid.

545

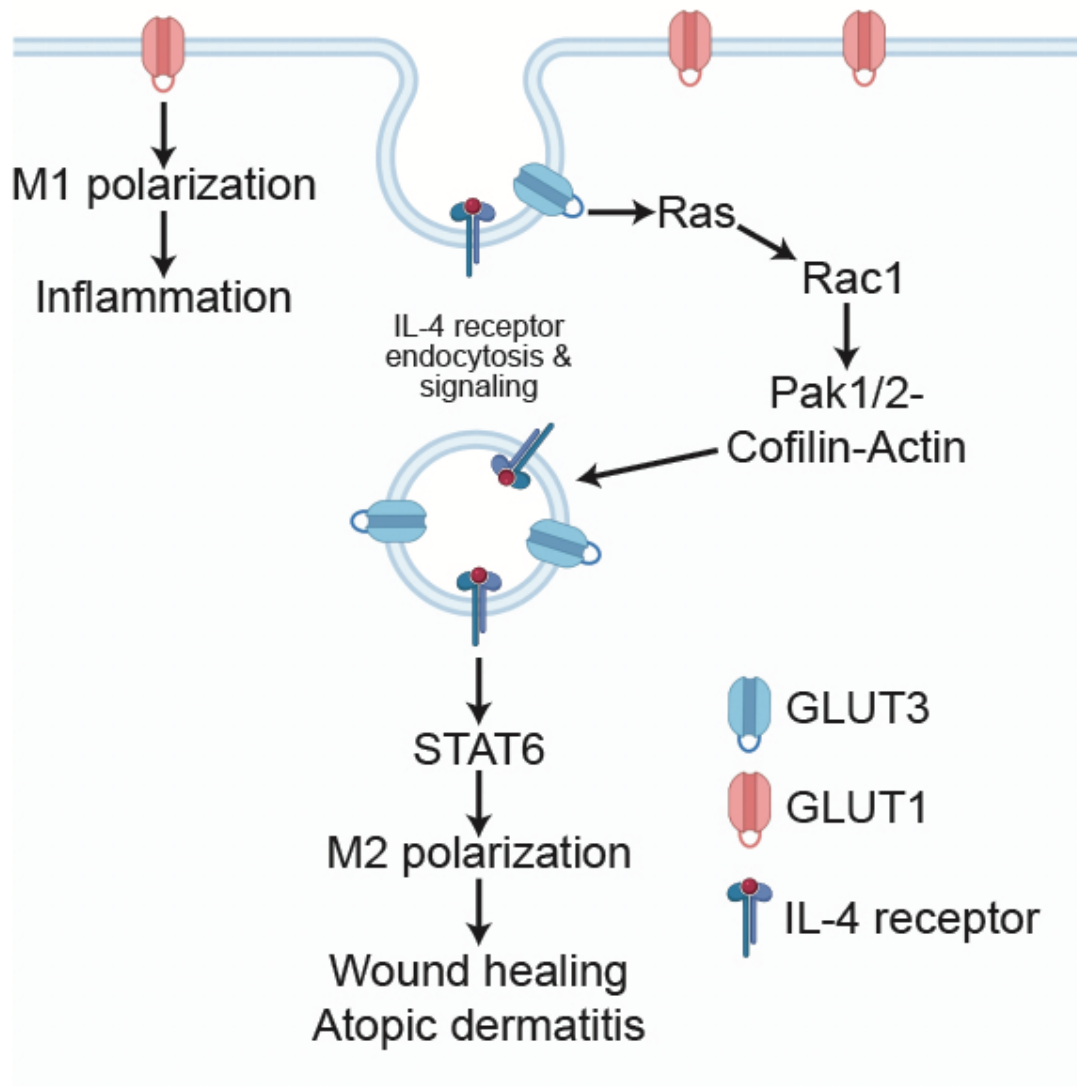

546

547 **Supplementary Figure 5.** Summary graphic

548

## 549 References

- 550 Bigenzahn, J.W., Collu, G.M., Kartnig, F., Pieraks, M., Vladimer, G.I., Heinz, L.X., Sedlyarov, V., Schischlik,  
551 F., Fauster, A., Rebsamen, M., et al. (2018). LZTR1 is a regulator of RAS ubiquitination and signaling.  
552 *Science* 362, 1171-1177. 10.1126/science.aap8210.
- 553 Blouin, C.M., and Lamaze, C. (2013). Interferon gamma receptor: the beginning of the journey. *Front*  
554 *Immunol* 4, 267. 10.3389/fimmu.2013.00267.
- 555 Chandra, A., Grecco, H.E., Pisupati, V., Perera, D., Cassidy, L., Skoulidis, F., Ismail, S.A., Hedberg, C.,  
556 Hanzal-Bayer, M., Venkitaraman, A.R., et al. (2011). The GDI-like solubilizing factor PDEdelta sustains the  
557 spatial organization and signalling of Ras family proteins. *Nat Cell Biol* 14, 148-158. 10.1038/ncb2394.
- 558 Cho, H., Kwon, H.Y., Sharma, A., Lee, S.H., Liu, X., Miyamoto, N., Kim, J.J., Im, S.H., Kang, N.Y., and Chang,  
559 Y.T. (2022). Visualizing inflammation with an M1 macrophage selective probe via GLUT1 as the gating  
560 target. *Nat Commun* 13, 5974. 10.1038/s41467-022-33526-z.
- 561 Cho, S.J., Moon, J.S., Nikahira, K., Yun, H.S., Harris, R., Hong, K.S., Huang, H., Choi, A.M.K., and Stout-  
562 Delgado, H. (2020). GLUT1-dependent glycolysis regulates exacerbation of fibrosis via AIM2  
563 inflammasome activation. *Thorax* 75, 227-236. 10.1136/thoraxjnl-2019-213571.
- 564 Cura, A.J., and Carruthers, A. (2012). Role of monosaccharide transport proteins in carbohydrate  
565 assimilation, distribution, metabolism, and homeostasis. *Comprehensive Physiology* 2, 863-914.  
566 10.1002/cphy.c110024.
- 567 Deng, D., Sun, P., Yan, C., Ke, M., Jiang, X., Xiong, L., Ren, W., Hirata, K., Yamamoto, M., Fan, S., and Yan,  
568 N. (2015). Molecular basis of ligand recognition and transport by glucose transporters. *Nature* 526, 391-  
569 396. 10.1038/nature14655.
- 570 Deng, D., Xu, C., Sun, P., Wu, J., Yan, C., Hu, M., and Yan, N. (2014). Crystal structure of the human  
571 glucose transporter GLUT1. *Nature* 510, 121-125. 10.1038/nature13306.
- 572 Doherty, G.J., and McMahon, H.T. (2009). Mechanisms of endocytosis. *Annu Rev Biochem* 78, 857-902.  
573 10.1146/annurev.biochem.78.081307.110540.
- 574 Ferreira, J.M., Burnett, A.L., and Rameau, G.A. (2011). Activity-dependent regulation of surface glucose  
575 transporter-3. *J Neurosci* 31, 1991-1999. 10.1523/JNEUROSCI.1850-09.2011.
- 576 Fidler, T.P., Campbell, R.A., Funari, T., Dunne, N., Balderas Angeles, E., Middleton, E.A., Chaudhuri, D.,  
577 Weyrich, A.S., and Abel, E.D. (2017). Deletion of GLUT1 and GLUT3 Reveals Multiple Roles for Glucose  
578 Metabolism in Platelet and Megakaryocyte Function. *Cell Rep* 20, 881-894.  
579 10.1016/j.celrep.2017.06.083.
- 580 Freerman, A.J., Zhao, L., Pingili, A.K., Teng, B., Cozzo, A.J., Fuller, A.M., Johnson, A.R., Milner, J.J., Lim,  
581 M.F., Galanko, J.A., et al. (2019). Myeloid Slc2a1-Deficient Murine Model Revealed Macrophage  
582 Activation and Metabolic Phenotype Are Fueled by GLUT1. *J Immunol* 202, 1265-1286.  
583 10.4049/jimmunol.1800002.
- 584 Fu, Y., Maianu, L., Melbert, B.R., and Garvey, W.T. (2004). Facilitative glucose transporter gene  
585 expression in human lymphocytes, monocytes, and macrophages: a role for GLUT isoforms 1, 3, and 5 in  
586 the immune response and foam cell formation. *Blood Cells Mol Dis* 32, 182-190.  
587 10.1016/j.bcmd.2003.09.002.
- 588 Grassart, A., Dujeancourt, A., Lazarow, P.B., Dautry-Varsat, A., and Sauvonnnet, N. (2008). Clathrin-  
589 independent endocytosis used by the IL-2 receptor is regulated by Rac1, Pak1 and Pak2. *EMBO Rep* 9,  
590 356-362. 10.1038/embor.2008.28.
- 591 Grimes, M.L., Zhou, J., Beattie, E.C., Yuen, E.C., Hall, D.E., Valletta, J.S., Topp, K.S., LaVail, J.H., Bunnett,  
592 N.W., and Mobley, W.C. (1996). Endocytosis of activated TrkA: evidence that nerve growth factor  
593 induces formation of signaling endosomes. *J Neurosci* 16, 7950-7964.
- 594 Harris, D.S., Slot, J.W., Geuze, H.J., and James, D.E. (1992). Polarized distribution of glucose transporter  
595 isoforms in Caco-2 cells. *Proc Natl Acad Sci U S A* 89, 7556-7560. 10.1073/pnas.89.16.7556.



596 Hu, X., Li, J., Fu, M., Zhao, X., and Wang, W. (2021). The JAK/STAT signaling pathway: from bench to  
597 clinic. *Signal Transduct Target Ther* 6, 402. 10.1038/s41392-021-00791-1.

598 Huttlin, E.L., Ting, L., Bruckner, R.J., Gebreab, F., Gygi, M.P., Szpyt, J., Tam, S., Zarraga, G., Colby, G.,  
599 Baltier, K., et al. (2015). The BioPlex Network: A Systematic Exploration of the Human Interactome. *Cell*  
600 162, 425-440. 10.1016/j.cell.2015.06.043.

601 Iancu, C.V., Bocci, G., Ishtikhar, M., Khamrai, M., Oreb, M., Oprea, T.I., and Choe, J.Y. (2022). GLUT3  
602 inhibitor discovery through in silico ligand screening and in vivo validation in eukaryotic expression  
603 systems. *Sci Rep* 12, 1429. 10.1038/s41598-022-05383-9.

604 Kasraie, S., and Werfel, T. (2013). Role of macrophages in the pathogenesis of atopic dermatitis.  
605 *Mediators Inflamm* 2013, 942375. 10.1155/2013/942375.

606 Koo, J.H., Jang, H.Y., Lee, Y., Moon, Y.J., Bae, E.J., Yun, S.K., and Park, B.H. (2019). Myeloid cell-specific  
607 sirtuin 6 deficiency delays wound healing in mice by modulating inflammation and macrophage  
608 phenotypes. *Exp Mol Med* 51, 1-10. 10.1038/s12276-019-0248-9.

609 Kovalski, J.R., Bhaduri, A., Zehnder, A.M., Neela, P.H., Che, Y., Wozniak, G.G., and Khavari, P.A. (2019).  
610 The Functional Proximal Proteome of Oncogenic Ras Includes mTORC2. *Mol Cell* 73, 830-844 e812.  
611 10.1016/j.molcel.2018.12.001.

612 Kurgonaitė, K., Gandhi, H., Kurth, T., Pautot, S., Schwille, P., Weidemann, T., and Bokel, C. (2015).  
613 Essential role of endocytosis for interleukin-4-receptor-mediated JAK/STAT signalling. *J Cell Sci* 128,  
614 3781-3795. 10.1242/jcs.170969.

615 Lee, E.E., Ma, J., Sacharidou, A., Mi, W., Salato, V.K., Nguyen, N., Jiang, Y., Pascual, J.M., North, P.E.,  
616 Shaul, P.W., et al. (2015). A Protein Kinase C Phosphorylation Motif in GLUT1 Affects Glucose Transport  
617 and is Mutated in GLUT1 Deficiency Syndrome. *Mol Cell* 58, 845-853. 10.1016/j.molcel.2015.04.015.

618 Ley, K. (2017). M1 Means Kill; M2 Means Heal. *J Immunol* 199, 2191-2193. 10.4049/jimmunol.1701135.

619 Li, M., Hener, P., Zhang, Z., Kato, S., Metzger, D., and Chambon, P. (2006). Topical vitamin D3 and low-  
620 calcemic analogs induce thymic stromal lymphopoietin in mouse keratinocytes and trigger an atopic  
621 dermatitis. *Proc Natl Acad Sci U S A* 103, 11736-11741. 10.1073/pnas.0604575103.

622 Li, M., Messaddeq, N., Teletin, M., Pasquali, J.L., Metzger, D., and Chambon, P. (2005). Retinoid X  
623 receptor ablation in adult mouse keratinocytes generates an atopic dermatitis triggered by thymic  
624 stromal lymphopoietin. *Proc Natl Acad Sci U S A* 102, 14795-14800. 10.1073/pnas.0507385102.

625 Mantovani, A., Sica, A., and Locati, M. (2005). Macrophage polarization comes of age. *Immunity* 23, 344-  
626 346. 10.1016/j.immuni.2005.10.001.

627 McClory, H., Williams, D., Sapp, E., Gatune, L.W., Wang, P., DiFiglia, M., and Li, X. (2014). Glucose  
628 transporter 3 is a rab11-dependent trafficking cargo and its transport to the cell surface is reduced in  
629 neurons of CAG140 Huntington's disease mice. *Acta Neuropathol Commun* 2, 179. 10.1186/s40478-014-  
630 0178-7.

631 Moller, L.L.V., Klip, A., and Sylow, L. (2019). Rho GTPases-Emerging Regulators of Glucose Homeostasis  
632 and Metabolic Health. *Cells* 8. 10.3390/cells8050434.

633 Munoz-Rojas, A.R., Kelsey, I., Pappalardo, J.L., Chen, M., and Miller-Jensen, K. (2021). Co-stimulation  
634 with opposing macrophage polarization cues leads to orthogonal secretion programs in individual cells.  
635 *Nat Commun* 12, 301. 10.1038/s41467-020-20540-2.

636 Murray, P.J. (2017). Macrophage Polarization. *Annu Rev Physiol* 79, 541-566. 10.1146/annurev-physiol-  
637 022516-034339.

638 Navale, A.M., and Paranjape, A.N. (2016). Glucose transporters: physiological and pathological roles.  
639 *Biophys Rev* 8, 5-9. 10.1007/s12551-015-0186-2.

640 Oetjen, L.K., Mack, M.R., Feng, J., Whelan, T.M., Niu, H., Guo, C.J., Chen, S., Trier, A.M., Xu, A.Z., Tripathi,  
641 S.V., et al. (2017). Sensory Neurons Co-opt Classical Immune Signaling Pathways to Mediate Chronic Itch.  
642 *Cell* 171, 217-228 e213. 10.1016/j.cell.2017.08.006.

- 643 Okonkwo, U.A., Chen, L., Ma, D., Haywood, V.A., Barakat, M., Urao, N., and DiPietro, L.A. (2020).  
644 Compromised angiogenesis and vascular Integrity in impaired diabetic wound healing. *PLoS One* *15*,  
645 e0231962. 10.1371/journal.pone.0231962.
- 646 Orecchioni, M., Ghosheh, Y., Pramod, A.B., and Ley, K. (2019). Macrophage Polarization: Different Gene  
647 Signatures in M1(LPS+) vs. Classically and M2(LPS-) vs. Alternatively Activated Macrophages. *Front*  
648 *Immunol* *10*, 1084. 10.3389/fimmu.2019.01084.
- 649 Raja, M., and Kinne, R.K.H. (2020). Mechanistic Insights into Protein Stability and Self-aggregation in  
650 GLUT1 Genetic Variants Causing GLUT1-Deficiency Syndrome. *J Membr Biol* *253*, 87-99. 10.1007/s00232-  
651 020-00108-3.
- 652 Rehak, L., Giurato, L., Meloni, M., Panunzi, A., Manti, G.M., and Uccioli, L. (2022). The Immune-Centric  
653 Revolution in the Diabetic Foot: Monocytes and Lymphocytes Role in Wound Healing and Tissue  
654 Regeneration-A Narrative Review. *J Clin Med* *11*. 10.3390/jcm11030889.
- 655 Sakyo, T., and Kitagawa, T. (2002). Differential localization of glucose transporter isoforms in non-  
656 polarized mammalian cells: distribution of GLUT1 but not GLUT3 to detergent-resistant membrane  
657 domains. *Biochim Biophys Acta* *1567*, 165-175. 10.1016/s0005-2736(02)00613-2.
- 658 Sauvonnet, N., Dujeancourt, A., and Dautry-Varsat, A. (2005). Cortactin and dynamin are required for  
659 the clathrin-independent endocytosis of gammac cytokine receptor. *J Cell Biol* *168*, 155-163.  
660 10.1083/jcb.200406174.
- 661 Scita, G., Tenca, P., Frittoli, E., Tocchetti, A., Innocenti, M., Giardina, G., and Di Fiore, P.P. (2000).  
662 Signaling from Ras to Rac and beyond: not just a matter of GEFs. *EMBO J* *19*, 2393-2398.  
663 10.1093/emboj/19.11.2393.
- 664 Sica, A., and Mantovani, A. (2012). Macrophage plasticity and polarization: in vivo veritas. *J Clin Invest*  
665 *122*, 787-795. 10.1172/JCI59643.
- 666 Simpson, I.A., Dwyer, D., Malide, D., Moley, K.H., Travis, A., and Vannucci, S.J. (2008). The facilitative  
667 glucose transporter GLUT3: 20 years of distinction. *Am J Physiol Endocrinol Metab* *295*, E242-253.  
668 10.1152/ajpendo.90388.2008.
- 669 So, E.Y., Oh, J., Jang, J.Y., Kim, J.H., and Lee, C.E. (2007). Ras/Erk pathway positively regulates Jak1/STAT6  
670 activity and IL-4 gene expression in Jurkat T cells. *Mol Immunol* *44*, 3416-3426.  
671 10.1016/j.molimm.2007.02.022.
- 672 Sorkin, A., and von Zastrow, M. (2009). Endocytosis and signalling: intertwining molecular networks. *Nat*  
673 *Rev Mol Cell Biol* *10*, 609-622. 10.1038/nrm2748.
- 674 Suzuki, K., Meguro, K., Nakagomi, D., and Nakajima, H. (2017). Roles of alternatively activated M2  
675 macrophages in allergic contact dermatitis. *Allergol Int* *66*, 392-397. 10.1016/j.alit.2017.02.015.
- 676 Tian, T., Harding, A., Inder, K., Plowman, S., Parton, R.G., and Hancock, J.F. (2007). Plasma membrane  
677 nanoswitches generate high-fidelity Ras signal transduction. *Nat Cell Biol* *9*, 905-914. 10.1038/ncb1615.
- 678 Vieira, A.V., Lamaze, C., and Schmid, S.L. (1996). Control of EGF receptor signaling by clathrin-mediated  
679 endocytosis. *Science* *274*, 2086-2089. 10.1126/science.274.5295.2086.
- 680 Weischenfeldt, J., and Porse, B. (2008). Bone Marrow-Derived Macrophages (BMM): Isolation and  
681 Applications. *CSH Protoc* *2008*, pdb prot5080. 10.1101/pdb.prot5080.
- 682 Wery-Zennaro, S., Zugaza, J.L., Letourneur, M., Bertoglio, J., and Pierre, J. (2000). IL-4 regulation of IL-6  
683 production involves Rac/Cdc42- and p38 MAPK-dependent pathways in keratinocytes. *Oncogene* *19*,  
684 1596-1604. 10.1038/sj.onc.1203458.
- 685 Zhang, Z., Li, X., Yang, F., Chen, C., Liu, P., Ren, Y., Sun, P., Wang, Z., You, Y., Zeng, Y.X., and Li, X. (2021).  
686 DHH9-mediated GLUT1 S-palmitoylation promotes glioblastoma glycolysis and tumorigenesis. *Nat*  
687 *Commun* *12*, 5872. 10.1038/s41467-021-26180-4.
- 688 Zhang, Z., Zi, Z., Lee, E.E., Zhao, J., Contreras, D.C., South, A.P., Abel, E.D., Chong, B.F., Vandergriff, T.,  
689 Hosler, G.A., et al. (2018). Differential glucose requirement in skin homeostasis and injury identifies a  
690 therapeutic target for psoriasis. *Nat Med* *24*, 617-627. 10.1038/s41591-018-0003-0.

691 Zomer, H.D., and Trentin, A.G. (2018). Skin wound healing in humans and mice: Challenges in  
692 translational research. *J Dermatol Sci* 90, 3-12. 10.1016/j.jdermsci.2017.12.009.

693
